# Supplementary material for: Stage-Specific Effects of Early-life Tobacco Exposure on Mental Health, Inflammation, and Brain Structure-function Coupling
Source: Research Square preprint supplement (doi:10.21203/rs.3.rs-7427152/v1), 2025-09-08
Supplement: Supplementary file 1 [file ecc22aff11bca5c6d4926086.docx]

|  |  |
| --- | --- |

Supplementary Materials for

**Stage-Specific Effects of Early Tobacco Exposure on Mental Health, Inflammation, and Brain Coupling**

**This file includes:**

eSupplementary Texts

- 1. MRI Data Acquisition
  2. Statistical analysis
  3. Inflammation as mediator of the association between early exposure and SF coupling

eTables 1 to 29

eFigures 1 to 5

eReferences (1 to 2)

**﻿eSupplementary Text**

1. **MRI Data Acquisition**

Resting-state and diffusion MRI data were acquired from the UK Biobank imaging cohort using Siemens 3T Skyra scanners (Siemens Healthcare, Erlangen, Germany) at three sites (Manchester, Newcastle, and Reading) following a harmonized acquisition protocol (<http://www.fmrib.ox.ac.uk/ukbiobank/protocol/V4_23092014.pdf>). Resting-state functional MRI (rs-fMRI) data were collected using a gradient-echo echo-planar imaging (GE-EPI) sequence with the following parameters: repetition time (TR) = 735 ms; echo time (TE) = 39 ms; voxel size = 2.4 × 2.4 × 2.4 mm³; matrix size = 88 × 88 × 64; flip angle = 52°; multiband acceleration factor = 8; no in-plane acceleration (iPAT); and fat saturation. Each rs-fMRI scan lasted 6 minutes. Diffusion-weighted imaging (DWI) was performed using a spin-echo EPI sequence. The acquisition included 10 baseline (b ≈ 0 s/mm²) volumes, 50 volumes with b = 1000 s/mm², and 50 volumes with b = 2000 s/mm², each acquired along distinct diffusion-encoding directions, yielding 100 unique directions. All DWI volumes were acquired with an isotropic voxel size of 2 mm. The total scan time for DWI was 6 minutes and 32 seconds. Imaging data were preprocessed by the UK Biobank imaging team. Full details of the image processing and quality control (QC) pipeline are available in prior publications1,2.

1. **Statistical analysis**

Figure 1A provides a visual summary of the methodological approaches implemented throughout our research process. **To investigate the longitudinal association between early-life tobacco exposure and the incidence of depression and anxiety, we employed a Cox proportional hazards regression model, using follow-up time as the underlying time scale. Baseline mental disorder assessment served as the entry time, while the exit time was defined as the occurrence of an event or censoring due to death, loss to follow-up, or study completion. For analyses where in utero tobacco exposure was the independent variable, the unexposed group was used as the reference category. When examining age of smoking initiation, never-smokers and adulthood initiators were used as separate reference groups. The models were adjusted for gender, age, ethnicity, socioeconomic deprivation, educational attainment, family income, body mass index (BMI), alcohol status, and childhood body size/height.**

**We conducted independent t-tests to examine differences in inflammatory marker levels and SF coupling across 164 brain regions between individuals exposed and unexposed to in utero tobacco. Analysis of covariance (ANCOVA) was employed to assess differences in inflammatory markers and regional SF coupling across age of smoking initiation groups, with post hoc tests performed for pairwise comparisons. Additionally, we investigated whether in utero tobacco exposure interacted with age of smoking initiation to influence depression/anxiety risk, inflammation levels and regional SF coupling. The same set of covariates as previously listed was included in these analyses.**

**Using** **Cox proportional hazards models, we further treated inflammatory markers and regional SF coupling that showed significant associations with early-life tobacco exposure as continuous variables to examine their linear associations with the incidence of depression and anxiety. We also constructed models stratified by tertiles for each inflammatory marker and regional SF coupling, with the lowest tertile serving as the reference, to evaluate their nonlinear associations with the incidence of depression and anxiety. Meanwhile, we also examined the relationship between inflammatory markers and regional SF coupling using linear regression models. To correct for multiple comparisons, Bonferroni correction was applied for analyses of inflammatory marker levels, whereas the Benjamini-Hochberg false discovery rate (FDR) method was used for SF coupling analyses, given the large number of brain regions examined.**

**Mediation analyses were performed in R (“mediation” package) to test whether inflammatory levels and regional SF coupling mediated the association between early-life tobacco exposure and the incidence of depression and anxiety. Linear regression models were employed to assess the first segment of the mediation pathway, while survival regression models were used to evaluate the second segment involving the incidence of depression and anxiety. Additionally, we investigated whether inflammatory levels mediate the effect of early-life tobacco exposure on regional SF coupling, with both segments of this mediation pathway tested using linear regression models. For mediation models that reached statistical significance, we calculated the proportion of the effect mediated. The significance of mediation effects was tested through 2,000 bootstrap resampling iterations.**

**We further conducted a series of stratified analyses to assess whether each covariate moderated the associations of early-life tobacco exposure with depression and anxiety incidence, inflammatory marker levels, and regional SF coupling. Moderation was tested by including interaction terms between early-life tobacco exposure and each stratifying covariate in the models.**

1. **Inflammatory markers as mediators of the association between early exposure and depression/anxiety incidence**

Each of the nine inflammatory markers was significantly associated with the incidence of depression and anxiety (Figure 3A) after adjusting for covariates and applying Bonferroni correction . Specifically, CRP, leukocytes, and neutrophils exhibited relatively strong effects, with each standard deviation (SD) increase associated with around a 20% higher risk of depression and approximately a 15% higher risk of anxiety. Conversely, higher monocyte percentage and lymphocyte percentage were protective, with each SD increase linked to a 5%-9% lower risk of depression and about a 5% reduction in anxiety risk.

Additionally, non-linear associations were found between all nine inflammatory markers and the incidence of depression (eFigure 2A). Similar non-linear patterns were observed for eight of the nine markers, except neutrophils, in relation to incident anxiety (eFigure 2B). These non-linear patterns were further supported by analyses of the tertiles for each inflammatory marker , which revealed consistent trends across inflammatory markers for both depression and anxiety.

Eight of the nine inflammatory markers (excluding monocyte percentage) significantly mediated the relationship between in utero exposure and the incidence of both depression and anxiety (Figure 3B). For depression, the percent of variance explained by the mediation effect varied between 0.28% and 8.11%, with CRP levels having the strongest mediation effect. For anxiety, the percent of variance explained by the mediation effect ranged from 0.25% to 7.56%, again with CRP showing the strongest mediation effect.

Each of the nine inflammatory markers significantly mediated the association between early initiation and depression (Figure 3C). The proportion of variance due to mediation ranged from 0.45% (monocyte percentage) to 9.71% (leukocyte count) among childhood initiators, and from 0.27% (lymphocyte percentage) to 11.77% (leukocyte count) among adolescent initiators. Anxiety outcomes showed similar patterns, with the mediation effect explaining 0.28%-9.89% of the variance for childhood initiators and 0.18%-11.89% for adolescent initiators, with leukocyte, neutrophil and CRP identified as the strongest mediators in both age groups.

| **eTable 1. Demographic characteristics of participants stratified by early-life tobacco exposure** | | | | | | | | | | |
| --- | --- | --- | --- | --- | --- | --- | --- | --- | --- | --- |
| **Characteristic** | **Level** | **In utero exposure to tobacco smoke** | | |  | **Age of smoking initiation** | | | | |
| **Unexposed (*n*=292103)** | **Exposed (*n*=115961)** | ***p*  value** |  | **Adolescence (*n*=83246)** | **Adulthood**  **(*n*=34970)** | **Childhood (*n*=22163)** | **Never Smokers (*n*=255905)** | ***p* value** |
| Age group | Middle age | 231957 (79.4%) | 98378 (84.8%) | <.001 |  | 63942 (76.8%) | 25719 (73.5%) | 18518 (83.6%) | 211572 (82.7%) | <.001 |
|  | Older age | 60146 (20.6%) | 17583 (15.2%) |  |  | 19304 (23.2%) | 9251 (26.5%) | 3645 (16.4%) | 44333 (17.3%) |  |
| Gender | Male | 159321 (54.5%) | 60732 (52.4%) | <.001 |  | 37313 (44.8%) | 18530 (53%) | 7314 (33%) | 149706 (58.5%) | <.001 |
|  | Female | 132782 (45.5%) | 55229 (47.6%) |  |  | 45933 (55.2%) | 16440 (47%) | 14849 (67%) | 106199 (41.5%) |  |
| Ethnicity | Ethnic Minority | 23669 (8.1%) | 1936 (1.7%) | <.001 |  | 2235 (2.7%) | 2167 (6.2%) | 689 (3.1%) | 18602 (7.3%) | <.001 |
|  | White | 268434 (91.9%) | 114025 (98.3%) |  |  | 81011 (97.3%) | 32803 (93.8%) | 21474 (96.9%) | 237303 (92.7%) |  |
| Deprivation | Lower | 101798 (34.9%) | 37782 (32.6%) | <.001 |  | 25451 (30.6%) | 10071 (28.8%) | 5218 (23.6%) | 94373 (36.9%) | <.001 |
|  | Higher | 92784 (31.8%) | 39609 (34.2%) |  |  | 30388 (36.5%) | 13966 (40%) | 10370 (46.9%) | 74389 (29.1%) |  |
|  | Middle | 97171 (33.3%) | 38422 (33.2%) |  |  | 27325 (32.9%) | 10888 (31.2%) | 6540 (29.6%) | 86827 (34%) |  |
| Education | Less  than college | 186440 (64.3%) | 82527 (71.8%) | <.001 |  | 63448 (76.9%) | 21971 (63.4%) | 18487 (84.1%) | 161852 (63.7%) | <.001 |
|  | Above college | 103427 (35.7%) | 32469 (28.2%) |  |  | 19089 (23.1%) | 12668 (36.6%) | 3491 (15.9%) | 92144 (36.3%) |  |
| Family  average income | Unknown | 29469 (10.6%) | 10133 (9.1%) | <.001 |  | 7742 (9.8%) | 3036 (9.2%) | 1884 (9%) | 26946 (11.1%) | <.001 |
|  | High | 14783 (5.3%) | 5496 (5%) |  |  | 2760 (3.5%) | 1519 (4.6%) | 479 (2.3%) | 13659 (5.6%) |  |
|  | Low | 179893 (64.9%) | 73984 (66.8%) |  |  | 56576 (71.6%) | 22932 (69.4%) | 15684 (75.1%) | 152985 (63%) |  |
|  | Middle | 52928 (19.1%) | 21148 (19.1%) |  |  | 11950 (15.1%) | 5541 (16.8%) | 2844 (13.6%) | 49300 (20.3%) |  |
| BMI type | Normal | 102136 (35.2%) | 34480 (29.9%) | <.001 |  | 23251 (28.1%) | 10983 (31.6%) | 5157 (23.4%) | 91889 (36.1%) | <.001 |
|  | Overweight | 123518 (42.5%) | 49307 (42.7%) |  |  | 37102 (44.8%) | 14816 (42.6%) | 9529 (43.3%) | 106111 (41.7%) |  |
|  | Obesity | 64845 (22.3%) | 31623 (27.4%) |  |  | 22453 (27.1%) | 8964 (25.8%) | 7316 (33.3%) | 56594 (22.2%) |  |
| Alcohol status | Never | 24819 (8.5%) | 7318 (6.3%) | <.001 |  | 47606 (67.1%) | 22199 (73.8%) | 10815 (56.5%) | 165882 (72.6%) | <.001 |
|  | Alcohol use | 267053 (91.5%) | 108575 (93.7%) |  |  | 23344 (32.9%) | 7891 (26.2%) | 8322 (43.5%) | 62634 (27.4%) |  |
| Comparative body size at age 10 | About average | 148857 (52%) | 55086 (48.1%) | <.001 |  | 4833 (5.8%) | 2281 (6.5%) | 1708 (7.7%) | 23727 (9.3%) | <.001 |
|  | Plumper | 42598 (14.9%) | 20559 (18%) |  |  | 78357 (94.2%) | 32654 (93.5%) | 20423 (92.3%) | 231999 (90.7%) |  |
|  | Thinner | 94983 (33.2%) | 38844 (33.9%) |  |  | 41631 (50.9%) | 17801 (51.9%) | 10079 (46.4%) | 129277 (51.6%) |  |
| Comparative height at age 10 | About average | 156561 (54.6%) | 60355 (52.7%) | <.001 |  | 13495 (16.5%) | 5639 (16.4%) | 3903 (18%) | 38237 (15.3%) | <.001 |
|  | Shorter | 56389 (19.7%) | 25639 (22.4%) |  |  | 26662 (32.6%) | 10867 (31.7%) | 7754 (35.7%) | 83073 (33.2%) |  |
|  | Taller | 73999 (25.8%) | 28468 (24.9%) |  |  | 45087 (55%) | 18313 (53.3%) | 11500 (52.8%) | 136627 (54.5%) |  |

| **eTable 2. Associations between age of smoking initiation and incident depression, adjusted for an extended set of covariates. Never-smokers served as the reference group** | | | | |
| --- | --- | --- | --- | --- |
| **Characteristic** | | **Participants** | **HR (95% CI)** | ***p* value** |
| Smoking initiation age |  |  |  |  |
| Never smokers |  | 234357 (64.5%) |  |  |
| Adolescence |  | 76610 (21.1%) | 1.46 (1.40-1.52) | <.001 |
| Adulthood |  | 31968 (8.8%) | 1.41 (1.33-1.49) | <.001 |
| Childhood |  | 20158 (5.6%) | 1.95 (1.84-2.07) | <.001 |
| Age group |  |  |  |  |
| Middle age |  | 295384 (81.4%) |  |  |
| Older age |  | 67709 (18.6%) | 1.13 (1.08-1.18) | <.001 |
| Gender |  |  |  |  |
| Male |  | 192058 (52.9%) |  |  |
| Female |  | 171035 (47.1%) | 0.69 (0.67-0.71) | <.001 |
| Education |  |  |  |  |
| Less than college |  | 241384 (66.5%) |  |  |
| Above college |  | 121709 (33.5%) | 0.81 (0.77-0.84) | <.001 |
| Ethnicity |  |  |  |  |
| Ethnic minority |  | 19143 (5.3%) |  |  |
| White |  | 343950 (94.7%) | 1.29 (1.19-1.40) | <.001 |
| Deprivation |  |  |  |  |
| Lower |  | 126700 (34.9%) |  |  |
| Higher |  | 114488 (31.5%) | 1.40 (1.35-1.46) | <.001 |
| Middle |  | 121905 (33.6%) | 1.09 (1.05-1.14) | <.001 |
| Family average income |  |  |  |  |
| Unknown |  | 36790 (10.1%) |  |  |
| High |  | 18135 (5.0%) | 0.44 (0.39-0.51) | <.001 |
| Low |  | 239796 (66.0%) | 1.14 (1.08-1.20) | <.001 |
| Middle |  | 68372 (18.8%) | 0.71 (0.66-0.76) | <.001 |
| BMI type |  |  |  |  |
| Normal |  | 121314 (33.4%) |  |  |
| Overweight |  | 155018 (42.7%) | 1.15 (1.10-1.20) | <.001 |
| Obesity |  | 86761 (23.9%) | 1.55 (1.48-1.62) | <.001 |
| Alcohol status |  |  |  |  |
| Never |  | 27460 (7.6%) |  |  |
| Alcohol use |  | 335633 (92.4%) | 0.66 (0.62-0.69) | <.001 |
| Comparative body size at age 10 |  |  |  |  |
| About average |  | 186370 (51.3%) |  |  |
| Plumper |  | 57058 (15.7%) | 1.14 (1.09-1.20) | <.001 |
| Thinner |  | 119665 (33.0%) | 1.17 (1.13-1.22) | <.001 |
| Comparative height at age 10 |  |  |  |  |
| About average |  | 197317 (54.3%) |  |  |
| Shorter |  | 73885 (20.3%) | 1.00 (0.95-1.04) | 0.825 |
| Taller |  | 91891 (25.3%) | 1.04 (1.00-1.08) | 0.058 |
|  | | | |  |

| **eTable 3. Associations between age of smoking initiation and incident anxiety, adjusted for an extended set of covariates. Never-smokers served as the reference group** | | | | |
| --- | --- | --- | --- | --- |
| **Characteristic** | | **Participants** | **HR (95% CI)** | ***p* value** |
| Smoking initiation age |  |  |  |  |
| Never smokers |  | 234357 (64.5%) |  |  |
| Adolescence |  | 76610 (21.1%) | 1.32 (1.27-1.38) | <.001 |
| Adulthood |  | 31968 (8.8%) | 1.28 (1.21-1.36) | <.001 |
| Childhood |  | 20158 (5.6%) | 1.60 (1.50-1.71) | <.001 |
| Age group |  |  |  |  |
| Middle age |  | 295384 (81.4%) |  |  |
| Older age |  | 67709 (18.6%) | 1.28 (1.23-1.33) | <.001 |
| Gender |  |  |  |  |
| Male |  | 192058 (52.9%) |  |  |
| Female |  | 171035 (47.1%) | 0.59 (0.57-0.62) | <.001 |
| Education |  |  |  |  |
| Less than college |  | 241384 (66.5%) |  |  |
| Above college |  | 121709 (33.5%) | 0.82 (0.78-0.85) | <.001 |
| Ethnicity |  |  |  |  |
| Ethnic minority |  | 19143 (5.3%) |  |  |
| White |  | 343950 (94.7%) | 1.27 (1.17-1.38) | <.001 |
| Deprivation |  |  |  |  |
| Lower |  | 126700 (34.9%) |  |  |
| Higher |  | 114488 (31.5%) | 1.25 (1.20-1.30) | <.001 |
| Middle |  | 121905 (33.6%) | 1.04 (0.99-1.08) | 0.085 |
| Family average income |  |  |  |  |
| Unknown |  | 36790 (10.1%) |  |  |
| High |  | 18135 (5.0%) | 0.41 (0.36-0.47) | <0.001 |
| Low |  | 239796 (66.0%) | 1.01 (0.96-1.06) | 0.744 |
| Middle |  | 68372 (18.8%) | 0.68 (0.63-0.73) | <.001 |
| BMI type |  |  |  |  |
| Normal |  | 121314 (33.4%) |  |  |
| Overweight |  | 155018 (42.7%) | 1.07 (1.02-1.11) | 0.002 |
| Obesity |  | 86761 (23.9%) | 1.24 (1.19-1.30) | <.001 |
| Alcohol status |  |  |  |  |
| Never |  | 27460 (7.6%) |  |  |
| Alcohol use |  | 335633 (92.4%) | 0.73 (0.69-0.77) | <.001 |
| Comparative body size at age 10 |  |  |  |  |
| About average |  | 186370 (51.3%) |  |  |
| Plumper |  | 57058 (15.7%) | 1.08 (1.03-1.13) | 0.003 |
| Thinner |  | 119665 (33.0%) | 1.19 (1.15-1.24) | <.001 |
| Comparative height at age 10 |  |  |  |  |
| About average |  | 197317 (54.3%) |  |  |
| Sho rter |  | 73885 (20.3%) | 1.05 (1.00-1.09) | 0.041 |
| Taller |  | 91891 (25.3%) | 1.04 (1.00-1.09) | 0.042 |

| **eTable 4. Mediating effect of inflammatory markers on the relationship between in utero exposure to tobacco smoke and incident depression** | | | | | | | | |
| --- | --- | --- | --- | --- | --- | --- | --- | --- |
| **Inflammation mediator** | **Proportion Mediated (%)** | | | | **β a** | ***p* value a** | **HR b** | ***p* value b** |
| **Value** | **95% CI (Lower)** | **95% CI**  **(Upper)** | ***p* value** |
| CRP | 8.11 | 6.75 | 9.28 | <0.001 | .09 | 2.53x10-128 | 1.15 | 2.15x10-33 |
| Leukocyte | 5.24 | 4.23 | 6.15 | <0.001 | .06 | 5.08x10-70 | 1.13 | 2.55x10-37 |
| Lymphocyte | 1.21 | 0.89 | 1.59 | <0.001 | .04 | 5.59x10-24 | 1.05 | 3.02x10-40 |
| Lymphocyte % | 0.84 | 0.58 | 1.19 | <0.001 | -.02 | 8.01x10-10 | 0.94 | 7.47x10-41 |
| Monocyte | 1.66 | 1.16 | 2.07 | <0.001 | .04 | 2.11x10-35 | 1.06 | 4.72x10-40 |
| Monocyte % | 0.06 | -0.10 | 0.23 | .56 | <0.001 | .46 | 0.96 | 3.52x10-41 |
| Neutrophill | 4.57 | 3.93 | 5.39 | <0.001 | .06 | 8.79x10-59 | 1.13 | 6.46x10-38 |
| Neutrophill % | 0.82 | 0.52 | 1.19 | <0.001 | .02 | 5.93x10-9 | 1.06 | 7.63x10-41 |
| Platelet | 0.28 | 0.09 | 0.51 | <0.001 | .01 | 1.74x10-3 | 1.04 | 7.13x10-41 |
| a. Effect of the first half of the mediation pathway (regression analysis); b. Effect of the second half of the mediation pathway (hazard ratio). | | | | | | | | |

| **eTable 5. Mediating effect of inflammatory markers on the relationship between in utero exposure to tobacco smoke and incident anxiety** | | | | | | | | |
| --- | --- | --- | --- | --- | --- | --- | --- | --- |
| **Inflammation mediator** | **Proportion Mediated (%)** | | | | **β a** | ***p* value a** | **HR** **b** | ***p* value b** | |
| **Value** | **95% CI (Lower)** | **95% CI**  **(Upper)** | ***p* value** |
| CRP | 7.56 | 5.70 | 10.34 | <0.001 | .09 | 2.53x10-128 | 1.07 | 9.59x10-15 | |
| Leukocyte | 6.01 | 4.48 | 8.20 | <0.001 | .06 | 5.08x10-70 | 1.08 | 9.89x10-15 | |
| Lymphocyte | 1.50 | 1.00 | 2.18 | <0.001 | .04 | 5.59x10-24 | 1.03 | 5.37x10-16 | |
| Lymphocyte % | 0.88 | 0.51 | 1.36 | <0.001 | -.02 | 8.01x10-10 | 0.97 | 2.55x10-16 | |
| Monocyte | 2.21 | 1.47 | 3.02 | <0.001 | .04 | 2.11x10-35 | 1.04 | 6.94x10-16 | |
| Monocyte % | 0.06 | -0.08 | 0.21 | .44 | <0.001 | .46 | 0.98 | 1.90x10-16 | |
| Neutrophill | 5.24 | 4.15 | 7.02 | <0.001 | .06 | 8.79x10-59 | 1.07 | 4.32x10-15 | |
| Neutrophill % | 0.90 | 0.57 | 1.44 | <0.001 | .02 | 5.93x10-9 | 1.03 | 2.59x10-16 | |
| Platelet | 0.25 | 0.08 | 0.61 | <0.001 | .01 | 1.74x10-3 | 1.02 | 2.94x10-16 | |
| a. Effect of the first half of the mediation pathway(regression analysis); b. Effect of the second half of the mediation pathway. | | | | | | | | |

| **eTable 6. Mediating effect of inflammatory markers on the relationship between age of smoking initiation and incident depression** | | | | | | | | | | | |
| --- | --- | --- | --- | --- | --- | --- | --- | --- | --- | --- | --- |
| **Smoking initiation age** | **Inflammation marker** | | **Proportion Mediated (%)** | | | | **β a** | ***p* value a** | **HR b** | ***p* value b** |
| **Value** | **95% CI (Lower)** | **95% CI**  **(Upper)** | ***p* value** |
| Childhood | | CRP | 8.76 | 7.73 | 9.78 | <0.001 | .34 | <0.001 | 1.15 | 4.78x10-133 |
| vs. | | Leukocyte | 9.71 | 8.32 | 10.98 | <0.001 | .45 | <0.001 | 1.12 | 8.80x10-126 |
| Never smokers | | Lymphocyte | 2.10 | 1.25 | 2.94 | <0.001 | .33 | <0.001 | 1.03 | 1.69x10-145 |
|  | | Lymphocyte % | 0.49 | 0.32 | 0.67 | <0.001 | -.04 | 3.09x10-8 | 0.94 | 2.03x10-152 |
|  | | Monocyte | 2.37 | 1.68 | 3.07 | <0.001 | .26 | 2.19x10-313 | 1.05 | 8.78x10-146 |
|  | | Monocyte % | 0.45 | 0.26 | 0.68 | <0.001 | -.07 | 1.08x10-20 | 0.97 | 7.80x10-152 |
|  | | Neutrophill | 8.79 | 7.76 | 10.38 | <0.001 | .41 | <0.001 | 1.12 | 2.90x10-126 |
|  | | Neutrophill % | 0.58 | 0.40 | 0.74 | <0.001 | .05 | 2.07x10-10 | 1.07 | 4.29x10-152 |
|  | | Platelet | 0.89 | 0.64 | 1.17 | <0.001 | .12 | 1.19x10-65 | 1.04 | 3.83x10-152 |
|  | |  |  |  |  |  |  |  |  |  |
| Adolescence | | CRP | 9.27 | 8.18 | 10.64 | <0.001 | .21 | <0.001 | 1.13 | 5.86x10-85 |
| vs. | | Leukocyte | 11.77 | 10.30 | 13.49 | <0.001 | .29 | <0.001 | 1.12 | 2.10x10-76 |
| Never smokers | | Lymphocyte | 3.07 | 2.21 | 4.02 | <0.001 | .22 | <0.001 | 1.04 | 6.91x10-91 |
|  | | Lymphocyte % | 0.27 | 0.11 | 0.44 | <0.001 | -.01 | <0.001 | 0.94 | 2.40x10-97 |
|  | | Monocyte | 3.30 | 2.54 | 4.16 | <0.001 | .18 | <0.001 | 1.05 | 3.02x10-91 |
|  | | Monocyte % | 0.35 | 0.22 | 0.53 | <0.001 | -.03 | 3.10x10-13 | 0.97 | 1.18x10-96 |
|  | | Neutrophill | 9.70 | 8.42 | 10.98 | <0.001 | .25 | <0.001 | 1.11 | 4.64x10-79 |
|  | | Neutrophill % | 0.27 | 0.09 | 0.43 | <0.001 | .01 | <0.001 | 1.06 | 2.98x10-97 |
|  | | Platelet | 0.87 | 0.58 | 1.14 | <0.001 | .06 | 6.29x10-49 | 1.04 | 2.28x10-96 |
|  | |  |  |  |  |  |  |  |  |  |
| Adulthood | | CRP | 8.44 | 7.07 | 9.69 | <0.001 | .17 | 3.42x10-187 | 1.14 | 2.23x10-42 |
| vs. | | Leukocyte | 11.35 | 9.49 | 12.82 | <0.001 | .29 | <0.001 | 1.11 | 7.46x10-39 |
| Never smokers | | Lymphocyte | 2.70 | 1.43 | 3.69 | <0.001 | .24 | <0.001 | 1.03 | 8.00x10-46 |
|  | | Lymphocyte % | -0.32 | -0.58 | -0.06 | .02 | .01 | .02 | 0.94 | 2.63x10-49 |
|  | | Monocyte | 2.83 | 2.03 | 3.67 | <0.001 | .16 | 3.55x10-175 | 1.05 | 3.91x10-46 |
|  | | Monocyte % | 0.55 | 0.28 | 0.79 | <0.001 | -.05 | 2.53x10-18 | 0.97 | 3.64x10-48 |
|  | | Neutrophill | 9.41 | 7.99 | 11.12 | <0.001 | .23 | <0.001 | 1.11 | 5.89x10-40 |
|  | | Neutrophill % | -0.14 | -0.42 | 0.11 | .32 | -.01 | .27 | 1.06 | 4.43x10-49 |
|  | | Platelet | 0.63 | 0.38 | 0.93 | <0.001 | .04 | 6.38x10-15 | 1.04 | 1.09x10-48 |
| a. Effect of the first half of the mediation pathway(regression analysis); b. Effect of the second half of the mediation pathway. | | | | | | | | | | | |

| **eTable 7. Mediating effect of inflammatory markers on the relationship between age of smoking initiation and incident anxiety** | | | | | | | | | | | |
| --- | --- | --- | --- | --- | --- | --- | --- | --- | --- | --- | --- |
| **Smoking initiation age** | **Inflammation**  **marker** | | **Proportion Mediated (%)** | | | | **β a** | ***p* value a** | **HR b** | ***p* value b** |
| **Value** | **95% CI (Lower)** | **95% CI**  **(Upper)** | ***p* value** |
| Childhood | | CRP | 7.44 | 6.13 | 8.54 | <0.001 | .34 | <0.001 | 1.07 | 3.28x10-57 |
| vs. | | Leukocyte | 9.89 | 8.36 | 11.67 | <0.001 | .45 | <0.001 | 1.07 | 8.88x10-53 |
| Never smokers | | Lymphocyte | 3.15 | 1.94 | 4.35 | <0.001 | .33 | <0.001 | 1.03 | 2.89x10-60 |
|  | | Lymphocyte % | 0.33 | 0.16 | 0.56 | <0.001 | -.04 | 3.09x10-8 | 0.98 | 1.93x10-64 |
|  | | Monocyte | 3.20 | 2.25 | 4.09 | <0.001 | .26 | 2.19x10-313 | 1.04 | 1.08x10-60 |
|  | | Monocyte % | 0.28 | 0.06 | 0.52 | .04 | -.07 | 1.08x10-20 | 0.99 | 2.61x10-64 |
|  | | Neutrophill | 8.60 | 7.03 | 10.11 | <0.001 | .41 | <0.001 | 1.07 | 8.53x10-54 |
|  | | Neutrophill % | 0.44 | 0.26 | 0.71 | <0.001 | .05 | 2.07x10-10 | 1.03 | 2.73x10-64 |
|  | | Platelet | 0.56 | 0.09 | 1.02 | <0.001 | .12 | 1.19x10-65 | 1.01 | 2.23x10-64 |
|  | |  |  |  |  |  |  |  |  |  |
| Adolescence | | CRP | 7.85 | 6.55 | 9.46 | <0.001 | .21 | <0.001 | 1.07 | 6.99x10-45 |
| vs. | | Leukocyte | 11.89 | 9.71 | 14.06 | <0.001 | .29 | <0.001 | 1.07 | 2.23x10-39 |
| Never smokers | | Lymphocyte | 3.55 | 2.35 | 5.08 | <0.001 | .22 | <0.001 | 1.03 | 3.38x10-46 |
|  | | Lymphocyte % | 0.24 | 0.11 | 0.39 | <0.001 | -.01 | .002 | 0.97 | 6.03x10-50 |
|  | | Monocyte | 4.41 | 3.50 | 5.59 | <0.001 | .18 | <.001 | 1.04 | 6.02x10-46 |
|  | | Monocyte % | 0.18 | -0.04 | 0.39 | .10 | -.03 | 3.10x10-13 | 0.99 | 1.03x10-49 |
|  | | Neutrophill | 9.66 | 8.11 | 10.98 | <0.001 | .25 | <0.001 | 1.07 | 5.43x10-41 |
|  | | Neutrophill % | 0.25 | 0.09 | 0.43 | <0.001 | .01 | <0.001 | 1.03 | 6.85x10-50 |
|  | | Platelet | 0.53 | 0.11 | 0.94 | .04 | .06 | 6.29x10-49 | 1.01 | 9.78x10-50 |
|  | |  |  |  |  |  |  |  |  |  |
| Adulthood | | CRP | 6.48 | 4.94 | 8.74 | <0.001 | .17 | 3.42x10-187 | 1.06 | 7.09x10-20 |
| vs. | | Leukocyte | 11.05 | 8.34 | 14.82 | <0.001 | .29 | <0.001 | 1.06 | 7.55x10-18 |
| Never smokers | | Lymphocyte | 3.38 | 1.49 | 5.24 | <0.001 | .24 | <0.001 | 1.02 | 1.03x10-20 |
|  | | Lymphocyte % | -0.25 | -0.58 | 0.00 | .04 | .01 | .02 | 0.97 | 1.87x10-22 |
|  | | Monocyte | 3.81 | 2.41 | 5.06 | <0.001 | .16 | 3.55x10-175 | 1.04 | 8.91x10-21 |
|  | | Monocyte % | 0.23 | -0.09 | 0.81 | .20 | -.05 | 2.53x10-18 | 0.99 | 3.88x10-22 |
|  | | Neutrophill | 9.06 | 6.69 | 12.14 | <0.001 | .23 | <0.001 | 1.06 | 1.15x10-18 |
|  | | Neutrophill % | -0.12 | -0.38 | 0.10 | .20 | -.01 | .27 | 1.03 | 2.20x10-22 |
|  | | Platelet | 0.31 | -0.02 | 0.62 | .12 | .04 | 6.38x10-15 | 1.01 | 4.79x10-22 |
| a. Effect of the first half of the mediation pathway(regression analysis); b. Effect of the second half of the mediation pathway. | | | | | | | | | | | |

| **eTable 8. Brain regions showing significant associations with in utero exposure to tobacco** | | | | |
| --- | --- | --- | --- | --- |
| **Brain region** | **Coeff (95% CI)** | | ***t* value** | ***p* value*** |
| **Unexposed** | **Exposed** |
| L_posterior thalamus | 0.134(0.129-0.139) | 0.129(0.124-0.134) | 12.27 | 5.00x10-4 |
| L_putamen | 0.104(0.099-0.109) | 0.099(0.094-0.105) | 11.70 | 6.00x10-4 |
| L_G_oc_temp_med_Lingual | 0.222(0.218-0.227) | 0.234(0.229-0.239) | 89.67 | <2x10-16 |
| L_G_pariet_inf_Angular | 0.180(0.176-0.185) | 0.175(0.170-0.180) | 20.21 | <2x10-16 |
| L_S_collat_transv_post | 0.308(0.302-0.313) | 0.318(0.312-0.324) | 38.51 | <2x10-16 |
| R_G_oc_temp_med_Lingual | 0.170(0.165-0.175) | 0.179(0.174-0.184) | 45.10 | <2x10-16 |
| R_G_Ins_lg_and_S_cent_ins | 0.213(0.208-0.218) | 0.219(0.214-0.224) | 15.92 | 1.00x10-4 |
| R_G_and_S_cingul_Mid_Post | 0.188(0.183-0.193) | 0.183(0.177-0.188) | 13.51 | 2.00x10-4 |
| R_G_oc_temp_lat_fusifor | 0.270(0.264-0.275) | 0.275(0.269-0.281) | 12.81 | 3.00x10-4 |
| R_S_collat_transv_post | 0.252(0.246-0.259) | 0.259(0.252-0.266) | 13.05 | 3.00x10-4 |
| L_S_temporal_sup | 0.186(0.182-0.190) | 0.182(0.177-0.186) | 12.65 | 4.00x10-4 |
| R_Lat_Fis_post | 0.215(0.209-0.220) | 0.220(0.214-0.226) | 12.00 | 5.00x10-4 |
| R_G_and_S_occipital_inf | 0.295(0.289-0.301) | 0.300(0.294-0.307) | 9.93 | 1.60x10-3 |
| L_G_and_S_cingul_Mid_Post | 0.181(0.175-0.186) | 0.176(0.170-0.182) | 9.63 | 1.90x10-3 |
| R_G_and_S_cingul_Mid_Ant | 0.098(0.093-0.103) | 0.094(0.089-0.099) | 9.41 | 2.20x10-3 |
| R_S_precentral_inf_part | 0.264(0.259-0.269) | 0.260(0.255-0.265) | 9.06 | 2.60x10-3 |
| L_Pole_occipital | 0.297(0.292-0.302) | 0.301(0.296-0.306) | 8.45 | 3.70x10-3 |
| *All p values were two-sided. | | | | |

| **eTable 9. Associations of SF coupling of brain regions affected by****in utero exposure to tobacco with incident depression** | | | | | | | | |
| --- | --- | --- | --- | --- | --- | --- | --- | --- |
| **Brain region** | **Linear association between SF coupling and incident depression** | |  | **Associations between SF coupling tertile and incident depression** | | | | |
| **HR (95% CI)** | ***p* value*** |  | **Middle tertile** | |  | **Highest tertile** | |
|  | **HR (95% CI)** | ***p* value*** |  | **HR (95% CI)** | ***p* value*** |
| **L_G_and_S_cingul_Mid_Post** | **1.09 (1.02-1.17)** | **.01** |  | **0.99 (0.83-1.17)** | **.88** |  | **1.23 (1.04-1.45)** | **.01** |
| L_G_oc_temp_med_Lingua | 1.03 (0.96-1.10) | .37 |  | 0.84 (0.71-1.00) | .05 |  | 1.11 (0.95-1.31) | .19 |
| L_G_pariet_inf_Angular | 0.94 (0.88-1.00) | .06 |  | 0.86 (0.73-1.01) | .07 |  | 0.86 (0.73-1.01) | .07 |
| L_Pole_occipital | 1.00 (0.93-1.07) | .91 |  | 0.94 (0.79-1.11) | .46 |  | 1.00 (0.85-1.18) | .97 |
| L_S_collat_transv_post_ | 0.97 (0.91-1.04) | .45 |  | 0.91 (0.77-1.07) | .26 |  | 0.98 (0.83-1.15) | .78 |
| **L_S_temporal_sup** | **0.90 (0.84-0.97)** | **<0.001** |  | **0.87 (0.74-1.02)** | **.08** |  | **0.78 (0.66-0.92)** | **<0.001** |
| **R_G_and_S_occipital_inf** | **1.08 (1.01-1.16)** | **.03** |  | **0.87 (0.73-1.03)** | **.12** |  | **1.17 (1.00-1.37)** | **.06** |
| R_G_and_S_cingul_Mid_Ant | 0.98 (0.92-1.05) | .56 |  | 0.92 (0.78-1.08) | .32 |  | 0.94 (0.80-1.11) | .45 |
| R_G_and_S_cingul_Mid_Post | 1.05 (0.98-1.12) | .16 |  | 1.19 (1.01-1.41) | .04 |  | 1.15 (0.97-1.37) | .10 |
| R_G_Ins_lg_and_S_cent_ins | 1.01 (0.95-1.09) | .69 |  | 1.00 (0.85-1.18) | .98 |  | 1.00 (0.85-1.18) | .98 |
| R_G_oc_temp_lat_fusifor | 1.06 (0.99-1.14) | .09 |  | 1.14 (0.96-1.35) | .12 |  | 1.08 (0.91-1.28) | .36 |
| R_G_oc_temp_med_Lingual | 1.04 (0.97-1.11) | .27 |  | 1.03 (0.88-1.22) | .69 |  | 1.05 (0.89-1.24) | .55 |
| **R_Lat_Fis_post** | **1.10 (1.02-1.17)** | **<0.001** |  | **1.09 (0.92-1.30)** | **.30** |  | **1.26 (1.07-1.49)** | **.01** |
| R_S_collat_transv_post | 0.96 (0.90-1.03) | .23 |  | 1.08 (0.92-1.27) | .36 |  | 0.94 (0.79-1.11) | .46 |
| R_S_precentral_inf_part | 0.99 (0.92-1.06) | .69 |  | 0.94 (0.80-1.11) | .45 |  | 0.93 (0.79-1.10) | .41 |
| L_posterior thalamus | 1.02 (0.95-1.09) | .55 |  | 1.25 (1.05-1.47) | .01 |  | 1.09 (0.92-1.29) | .33 |
| L_putamen | 1.00 (0.93-1.07) | 1.00 |  | 0.94 (0.79-1.11) | .44 |  | 0.99 (0.84-1.16) | .87 |
| *All p values were two-sided, and no adjustments were made for multiple comparisons. | | | | | | | | |

| **eTable 10. Associations of SF coupling of brain regions affected by in utero tobacco exposure with incident anxiety** | | | | | | | |
| --- | --- | --- | --- | --- | --- | --- | --- |
| **Brain region** | **Linear association between SF coupling and incident anxiety** | |  | **Associations between SF coupling tertile and incident anxiety** | | | |
| **HR (95% CI)** | ***p* value*** |  | **Middle tertile** | | **Highest tertile** | |
|  | **HR (95% CI)** | ***p* value*** | **HR (95% CI)** | ***p* value*** |
| L_G_and_S_cingul_Mid_Post | 1.04 (0.97-1.11) | .27 |  | 1.09 (0.92-1.28) | .32 | 1.05 (0.89-1.24) | .54 |
| L_G_oc_temp_med_Lingual | 0.97 (0.91-1.04) | .38 |  | 0.99 (0.85-1.17) | .95 | 1.02 (0.86-1.19) | .86 |
| L_G_pariet_inf_Angular | 0.98 (0.92-1.05) | .60 |  | 0.96 (0.82-1.12) | .60 | 0.92 (0.79-1.09) | .34 |
| L_Pole_occipital | 1.02 (0.96-1.09) | .50 |  | 1.03 (0.87-1.20) | .75 | 0.99 (0.84-1.16) | .91 |
| L_S_collat_transv_post | 0.94 (0.88-1.01) | .08 |  | 0.99 (0.85-1.16) | .93 | 0.91 (0.78-1.07) | .27 |
| L_S_temporal_sup | 0.99 (0.93-1.06) | .82 |  | 1.07 (0.91-1.25) | .41 | 0.97 (0.82-1.14) | .73 |
| R_G_and_S_occipital_inf | 0.96 (0.90-1.03) | .24 |  | 0.92 (0.78-1.08) | .29 | 0.93 (0.80-1.10) | .41 |
| R_G_and_S_cingul_Mid_Ant | 0.98 (0.92-1.05) | .57 |  | 0.93 (0.79-1.09) | .38 | 0.94 (0.80-1.10) | .46 |
| R_G_and_S_cingul_Mid_Post | 1.01 (0.94-1.07) | .87 |  | 1.12 (0.95-1.31) | .17 | 1.01 (0.85-1.19) | .94 |
| R_G_Ins_lg_and_S_cent_ins | 1.05 (0.98-1.12) | .19 |  | 0.99 (0.84-1.16) | .89 | 1.09 (0.93-1.28) | .31 |
| R_G_oc_temp_lat_fusifort | 0.97 (0.91-1.03) | .32 |  | 0.88 (0.75-1.03) | .10 | 0.85 (0.73-1.00) | .05 |
| R_G_oc_temp_med_Lingual | 1.02 (0.96-1.09) | .51 |  | 1.07 (0.92-1.26) | .38 | 1.01 (0.86-1.19) | .92 |
| R_Lat_Fis_postt | 1.04 (0.97-1.11) | .25 |  | 1.04 (0.88-1.23) | .62 | 1.11 (0.94-1.30) | .22 |
| R_S_collat_transv_post | 0.97 (0.90-1.03) | .31 |  | 1.01 (0.86-1.19) | .89 | 0.94 (0.80-1.11) | .48 |
| **R_S_precentral_inf_part** | **0.92 (0.87-0.99)** | **.02** |  | **0.96 (0.82-1.13)** | **.63** | **0.84 (0.71-0.99)** | **.03** |
| L_posterior thalamus | 1.03 (0.96-1.10) | .44 |  | 1.19 (1.01-1.40) | .03 | 1.12 (0.95-1.31) | .19 |
| L_putamen | 0.98 (0.92-1.05) | .64 |  | 1.00 (0.86-1.18) | .95 | 0.96 (0.82-1.13) | .63 |
| *All p values were two-sided, and no adjustments were made for multiple comparisons. | | | | | | | |

| **eTable 11. Mediating effect of brain SF coupling in critical regions on the relationship between in utero exposure to tobacco and incident depression, anxiety** | | | | | | | | | | |
| --- | --- | --- | --- | --- | --- | --- | --- | --- | --- | --- |
| **Outcomes** | **Brain region** | **Proportion Mediated (%)** | | | | | **β a** | ***p* value a** | **HR b** | ***p* value b** | |
| **Value** | **95% CI (Lower)** | **95% CI**  **(Upper)** | | ***p* value** |
| Depression | L_G_and_S_cingul_Mid_Post | -1.45 | -5.34 | 0.21 | .08 | | -.04 | 2.74x10-3 | 1.52 | 8.58x10-3 | |
|  | L_S_temporal_sup | 2.79 | 1.02 | 13.17 | <0.001 | | -.04 | 5.79x10-4 | 0.43 | .01 | |
|  | R_G_and_S_occipital_inf | 1.15 | 0.04 | 4.39 | .04 | | .03 | 8.18x10-3 | 1.41 | .01 | |
|  | R_Lat_Fis_post | 2.20 | 0.63 | 9.36 | <0.001 | | .05 | 2.86x10-5 | 1.57 | .01 | |
|  |  |  |  |  |  | |  |  |  |  | |
| Anxiety | R_S_precentral_inf_part | 0.20 | -2.03 | 1.61 | .86 | | -.04 | 2.25x10-3 | 0.94 | 9.55x10-3 | |
| a. Effect of the first half of the mediation pathway; b. Effect of the second half of the mediation pathway. | | | | | | | | | | |  | |
|  | | | | | | | | | | |  | |

| **eTable 12.** **Brain regions showing significant associations with age of smoking initiation** | | | | | | |
| --- | --- | --- | --- | --- | --- | --- |
| **Brain region** | **SF coupling(95% CI)** | | | | ***F* value** | ***p*****value*** |
| **Childhood** | **Adolescence** | **Adulthood** | **Never-smokers** |
| R_anterior thalamus | 0.134(0.127-0.141) | 0.142(0.137-0.147) | 0.142(0.136-0.148) | 0.147(0.143-0.152) | 9.95 | <2x10-16 |
| L_aanterior thalamus | 0.151(0.143-0.159) | 0.161(0.155-0.169) | 0.159(0.152-0.165) | 0.164(0.159-0.169) | 6.11 | 4.00x10-4 |
| L_caudate nucleus | 0.200(0.191-0.209) | 0.201(0.195-0.208) | 0.199(0.192-0.207) | 0.210(0.204-0.215) | 10.59 | <2x10-16 |
| R_globus pallidus | 0.050(0.042-0.057) | 0.054(0.048-0.060) | 0.053(0.048-0.058) | 0.060(0.056-0.063) | 5.37 | <2x10-16 |
| L_G_and_S_transv_frontopol | 0.122(0.111-0.133) | 0.133(0.125-0.141) | 0.130(0.121-0.139) | 0.137(0.130-0.144) | 5.01 | <2x10-16 |
| L_G_front_middle | 0.361(0.354-0.367) | 0.364(0.359-0.369) | 0.361(0.355-0.366) | 0.369(0.365-0.373) | 10.05 | <2x10-16 |
| L_G_front_sup | 0.246(0.239-0.254) | 0.250(0.245-0.256) | 0.250(0.244-0.256) | 0.254(0.250-0.258) | 4.07 | 0.01 |
| L_G_insular_short | 0.090(0.081-0.098) | 0.086(0.080-0.093) | 0.084(0.077-0.092) | 0.092(0.086-0.098) | 4.60 | <2x10-16 |
| L_S_circular_insula_ant | 0.087(0.078-0.097) | 0.080(0.073-0.087) | 0.083(0.075-0.090) | 0.088(0.082-0.094) | 4.97 | <2x10-16 |
| L_S_front_inf | 0.338(0.330-0.346) | 0.344(0.338-0.350) | 0.345(0.338-0.351) | 0.347(0.342-0.352) | 3.53 | .01 |
| L_S_front_middle | 0.178(0.166-0.190) | 0.187(0.179-0.196) | 0.186(0.176-0.196) | 0.194(0.186-0.201) | 5.85 | 5.00x10-4 |
| L_S_front_sup | 0.214(0.207-0.222) | 0.216(0.211-0.222) | 0.214(0.208-0.221) | 0.222(0.217-0.227) | 7.06 | 1.00x10-4 |
| L_S_suborbital | 0.161(0.150-0.172) | 0.165(0.157-0.173) | 0.161(0.152-0.171) | 0.174(0.167-0.181) | 8.98 | <2x10-16 |
| L_posterior thalamus | 0.097(0.089-0.104) | 0.101(0.094-0.106) | 0.100(0.094-0.107) | 0.104(0.099-0.109) | 3.24 | .02 |
| R_posterior thalamus | 0.113(0.106-0.121) | 0.113(0.108-0.119) | 0.116(0.109-0.122) | 0.119(0.115-0.124) | 5.20 | <2x10-16 |
| R_G_and_S_cingul_Ant | 0.189(0.181-0.197) | 0.186(0.180-0.192) | 0.185(0.178-0.192) | 0.191(0.186-0.196) | 4.52 | <2x10-16 |
| R_G_front_middle | 0.335(0.329-0.341) | 0.336(0.331-0.340) | 0.336(0.331-0.341) | 0.342(0.338-0.346) | 10.26 | <2x10-16 |
| R_S_front_inf | 0.293(0.285-0.301) | 0.295(0.289-0.301) | 0.297(0.291-0.304) | 0.301(0.296-0.306) | 5.13 | <2x10-16 |
| R_S_front_sup | 0.199(0.192-0.207) | 0.199(0.194-0.205) | 0.200(0.194-0.206) | 0.205(0.200-0.209) | 5.03 | <2x10-16 |
| L_putamen | 0.097(0.089-0.104) | 0.101(0.095-0.106) | 0.100(0.094-0.107) | 0.104(0.099-0.109) | 3.35 | .02 |
| L_G_and_S_paracentral | 0.249(0.240-0.257) | 0.258(0.252-0.262) | 0.256(0.249-0.263) | 0.263(0.258-0.268) | 8.43 | <2x10-16 |
| L_S_cingul_Marginalis | 0.164(0.156-0.172) | 0.175(0.170-0.181) | 0.169(0.163-0.176) | 0.178(0.173-0.183) | 10.36 | <2x10-16 |
| R_G_and_S_paracentral | 0.248(0.239-0.256) | 0.251(0.245-0.257) | 0.248(0.239-0.256) | 0.258(0.253-0.264) | 9.21 | <2x10-16 |
| R_G_and_S_cingul_Mid_Ant | 0.092(0.084-0.099) | 0.092(0.086-0.098) | 0.092(0.086-0.098) | 0.099(0.094-0.104) | 8.68 | <2x10-16 |
| R_S_precentral_inf_part | 0.260(0.252-0.268) | 0.257(0.252-0.273) | 0.260(0.252-0.268) | 0.265(0.260-0.270) | 7.15 | 1.00x10-4 |
| R_S_subparietal | 0.245(0.239-0.252) | 0.245(0.240-0.250) | 0.246(0.240-0.251) | 0.251(0.247-0.255) | 7.35 | 1.00x10-4 |
| R_G_precuneus | 0.311(0.305-0.317) | 0.309(0.304-0.313) | 0.308(0.302-0.313) | 0.313(0.310-0.317) | 6.37 | 3.00x10-4 |
| L_G_postcentral | 0.263(0.256-0.271) | 0.263(0.258-0.269) | 0.261(0.254-0.267) | 0.268(0.263-0.273) | 5.46 | 9.00x10-4 |
| L_S_postcentral | 0.276(0.269-0.282) | 0.279(0.274-0.283) | 0.276(0.270-0.281) | 0.282(0.278-0.286) | 5.34 | 1.10x10-3 |
| R_G_and_S_occipital_inf | 0.310(0.300-0.319) | 0.298(0.291-0.304) | 0.298(0.290-0.306) | 0.296(0.289-0.301) | 5.29 | 1.20x10-3 |
| R_G_pariet_inf_Angular | 0.188(0.181-0.194) | 0.190(0.185-0.195) | 0.187(0.182-0.193) | 0.193(0.189-0.198) | 5.19 | 1.40x10-3 |
| L_S_precentral_sup_part | 0.196(0.188-0.204) | 0.199(0.194-0.205) | 0.200(0.194-0.205) | 0.204(0.200-0.209) | 5.12 | 1.50x10-3 |
| R_S_cingul_Marginalis | 0.176(0.169-0.184) | 0.183(0.177-0.188) | 0.176(0.169-0.184) | 0.185(0.180-0.190) | 5.07 | 1.60x10-3 |
| R_G_temporal_middle | 0.220(0.212-0.228) | 0.226(0.220-0.232) | 0.220(0.212-0.228) | 0.228(0.223-0.233) | 4.85 | 2.20x10-3 |
| R_S_precentral_sup_part | 0.162(0.154-0.169) | 0.163(0.158-0.169) | 0.164(0.158-0.170) | 0.168(0.164-0.173) | 4.48 | 3.80x10-3 |
| L_S_central | 0.221(0.214-0.228) | 0.224(0.219-0.229) | 0.224(0.218-0.230) | 0.228(0.224-0.232) | 4.44 | 3.00x10-3 |
| R_S_circular_insula_ant | 0.100(0.092-0.109) | 0.104(0.098-0.111) | 0.097(0.090-0.104) | 0.106(0.101-0.111) | 4.37 | 4.40x10-3 |
| L_G_precuneus | 0.294(0.289-0.300) | 0.292(0.288-0.297) | 0.294(0.289-0.300) | 0.296(0.292-0.300) | 4.12 | 6.20x10-3 |
| R_G_parietal_sup | 0.221(0.214-0.228) | 0.221(0.216-0.226) | 0.221(0.214-0.228) | 0.225(0.221-0.230) | 4.08 | 6.60x10-3 |
| R_S_pericallosal | 0.291(0.284-0.298) | 0.283(0.278-0.289) | 0.284(0.278-0.290) | 0.288(0.283-0.292) | 4.05 | 6.90x10-3 |
| L_G_temp_sup_G_T_transv | 0.235(0.226-0.244) | 0.225(0.219-0.232) | 0.228(0.220-0.235) | 0.231(0.225-0.237) | 3.87 | 8.90x10-3 |
| L_G_Ins_lg_and_S_cent_ins | 0.142(0.133-0.150) | 0.133(0.127-0.139) | 0.128(0.121-0.135) | 0.133(0.127-0.138) | 3.70 | .01 |
| R_S_occipital_ant | 0.222(0212-0.232) | 0.216(0.208-0.219) | 0.211(0.202-0.219) | 0.211(0.204-0.217) | 3.69 | .01 |
| L_G_parietal_sup | 0.197(0.190-0.204) | 0.201(0.197-0.206) | 0.198(0.193-0.204) | 0.203(0.199-0.207) | 3.67 | .01 |
| L_S_oc_middle_and_Lunatus | 0.340(0.333-0.348) | 0.340(0.334-0.345) | 0.343(0.337-0.350) | 0.336(0.332-0.341) | 3.68 | .01 |
| L_G_precentral | 0.276(0.269-0.283) | 0.284(0.279-0.290) | 0.285(0.279-0.291) | 0.286(0.281-0.291) | 3.67 | .01 |
| R_S_intrapariet_and_P_trans | 0.218(0.211-0.224) | 0.220(0.215-0.224) | 0.222(0.216-0.227) | 0.224(0.220-0.228) | 3.65 | .01 |
| L_S_oc_sup_and_transversal | 0.288(0.282-0.294) | 0.285(0.281-0.289) | 0.290(0.285-0.295) | 0.284(0.280-0.288) | 3.64 | .01 |
| R_G_oc_temp_med_Parahip | 0.087(0.078-0.095) | 0.089(0.082-0.095) | 0.089(0.082-0.095) | 0.094(0.088-0.099) | 3.58 | .01 |
| L_G_temp_sup_Lateral | 0.110(0.103-0.117) | 0.120(0.115-0.125) | 0.116(0.110-0.122) | 0.116(0.112-0.121) | 3.57 | .01 |
| *All p values were two-sided. | | | | | | |

| **eTable 13. Post Hoc p Values for SF Coupling by Smoking Initiation Age in ANOVA-Significant Regions** | | | | | | |
| --- | --- | --- | --- | --- | --- | --- |
| **Brain region** | adolescence vs. adult a | adolescence vs. childhood | adolescence vs. never_smokers | adult vs. childhood | adult vs. never_smokers | childhood vs. never_smokers |
| R_anterior thalamus |  | 0.026 | 0.002 | 0.031 | 0.031 | 0.000 |
| L_caudate nucleus |  |  | 0.000 |  | 0.001 | 0.015 |
| L_anterior thalamus |  | 0.015 |  |  |  | 0.001 |
| R_globus pallidus |  |  | 0.007 |  |  | 0.018 |
| Rutamen |  |  | 0.003 |  |  |  |
| Lutamen |  |  |  |  |  |  |
| Lutamen |  |  |  |  | 0.019 |  |
| L_G_and_Saracentral |  | 0.016 | 0.016 |  | 0.016 | 0.000 |
| L_G_front_middle |  |  | 0.001 |  | 0.000 | 0.006 |
| L_S_cingul_Marginalis | 0.049 | 0.001 |  |  | 0.001 | 0.000 |
| L_S_suborbital |  |  | 0.001 |  | 0.001 | 0.010 |
| R_G_and_Saracentral |  |  | 0.000 |  | 0.009 | 0.007 |
| R_G_and_S_cingul_Mid_Ant |  |  | 0.000 |  | 0.009 | 0.041 |
| R_G_front_middle |  |  | 0.000 |  | 0.006 | 0.013 |
| L_S_front_sup |  |  | 0.005 |  | 0.005 | 0.041 |
| R_Srecentral_inf |  |  | 0.000 |  |  |  |
| R_S_subparietal |  |  | 0.000 |  | 0.027 |  |
| R_Grecuneus |  |  | 0.003 |  | 0.006 |  |
| L_S_front_middle |  |  | 0.038 |  |  | 0.008 |
| L_Gostcentral |  |  | 0.012 |  | 0.012 |  |
| L_Sostcentral |  |  | 0.050 |  | 0.015 | 0.050 |
| R_G_and_S_occipital |  | 0.009 |  | 0.019 |  | 0.001 |
| R_Gariet_inf_Angular |  |  | 0.032 |  | 0.023 |  |
| L_Srecentral_sup |  |  | 0.018 |  |  | 0.024 |
| R_S_front_inf |  |  | 0.007 |  |  | 0.045 |
| R_S_cingul_Marginalis |  |  |  |  | 0.017 | 0.017 |
| R_S_front_sup |  |  | 0.007 |  |  |  |
| L_G_and_S_transv_frontopol |  |  |  |  |  | 0.006 |
| L_S_circular_insula_ant |  |  | 0.002 |  |  |  |
| R_G_temporal_middle |  |  |  |  | 0.014 | 0.039 |
| L_G_insular_short |  |  | 0.016 |  | 0.016 |  |
| R_G_and_S_cingul_Ant |  |  | 0.013 |  | 0.043 |  |
| R_Srecentral_supart |  |  | 0.018 |  |  |  |
| L_S_central |  |  | 0.041 |  |  | 0.041 |
| R_S_circular_insula_ant | 0.047 |  |  |  | 0.005 |  |
| L_Grecuneus |  |  | 0.029 |  | 0.039 |  |
| R_Garietal_sup |  |  | 0.028 |  |  |  |
| L_G_front_sup |  |  |  |  |  |  |
| R_Sericallosal |  |  | 0.034 |  |  |  |
| L_G_temp_sup_G_T_transv |  | 0.040 | 0.018 |  |  |  |
| L_G_Ins_lg_and_S_cent_ins |  | 0.038 |  | 0.005 |  | 0.022 |
| R_S_occipital_ant |  |  |  |  |  | 0.044 |
| L_Garietal_sup |  |  |  |  |  |  |
| L_S_oc_middle_and_Lunatus |  |  |  |  | 0.027 |  |
| L_Grecentral |  | 0.026 |  | 0.026 |  | 0.007 |
| R_S_intrapariet_and_trans |  |  | 0.043 |  |  |  |
| L_S_oc_sup_and_transversal |  |  |  |  | 0.016 |  |
| R_G_oc_temp_medarahip |  |  | 0.037 |  |  |  |
| L_G_temp_sup_Lateral |  | 0.013 |  |  |  |  |
| L_S_front_inf |  |  |  |  |  | 0.030 |
| a. Blank cells indicate corrected *p* values > 0.05. | | | | | | |
|  |  |  |  |  |  |  |

| **eTable 14. Associations of SF coupling of brain regions affected by age of smoking initiation with incident depression** | | | | | | | | | |
| --- | --- | --- | --- | --- | --- | --- | --- | --- | --- |
| **Brain region** | **Linear association between SF coupling and incident depression** | |  | **Associations between SF coupling tertile and incident depression** | | | | | |
| **HR (95% CI)** | ***p* value*** |  | **Middle tertile** | |  | **Highest tertile** | | |
|  | **HR (95% CI)** | ***p* value*** |  | **HR (95% CI)** | ***p* value*** | |
| L_G_and_S_paracentral | 1.00 (0.94-1.07) | .92 |  | 1.04 (0.88-1.23) | .62 |  | 0.93 (0.79-1.10) | .41 |
| L_G_and_S_transv_frontopol | 1.00 (0.93-1.07) | .89 |  | 1.11 (0.94-1.31) | .23 |  | 1.01 (0.85-1.19) | .95 |
| L_G_front_middle | 0.95 (0.89-1.02) | .16 |  | 1.01 (0.86-1.19) | .90 |  | 0.91 (0.77-1.08) | .29 |
| L_G_front_sup | 1.01 (0.94-1.08) | .86 |  | 1.06 (0.89-1.25) | .52 |  | 1.02 (0.86-1.20) | .83 |
| L_G_Ins_lg_and_S_cent_ins | 1.03 (0.96-1.10) | .41 |  | 1.09 (0.93-1.29) | .29 |  | 1.08 (0.92-1.28) | .35 |
| L_G_insular_short | 1.05 (0.98-1.12) | .18 |  | 0.95 (0.81-1.13) | .59 |  | 1.11 (0.94-1.31) | .22 |
| L_G_parietal_sup | 1.04 (0.97-1.11) | .31 |  | 1.09 (0.92-1.29) | .30 |  | 1.05 (0.89-1.24) | .59 |
| L_G_postcentral | 0.96 (0.90-1.03) | .26 |  | 0.88 (0.75-1.04) | .14 |  | 0.85 (0.72-1.00) | .06 |
| L_G_precentral | 1.01 (0.94-1.08) | .80 |  | 0.97 (0.82-1.14) | .70 |  | 1.01 (0.86-1.19) | .92 |
| L_G_precuneus | 1.04 (0.97-1.11) | .31 |  | 1.03 (0.87-1.22) | .74 |  | 1.16 (0.98-1.38) | .08 |
| L_G_temp_sup_G_T_transv | 1.02 (0.95-1.09) | .59 |  | 0.87 (0.74-1.03) | .10 |  | 1.00 (0.85-1.18) | 1.00 |
| L_G_temp_sup_Lateral | 0.96 (0.90-1.03) | .28 |  | 1.06 (0.90-1.24) | .50 |  | 0.88 (0.75-1.05) | .15 |
| L_S_central | 1.04 (0.97-1.12) | .22 |  | 1.04 (0.88-1.23) | .63 |  | 1.12 (0.95-1.33) | .17 |
| L_S_cingul_Marginalis | 1.02 (0.95-1.09) | .57 |  | 1.04 (0.88-1.22) | .68 |  | 1.00 (0.85-1.19) | .97 |
| L_S_circular_insula_ant | 0.99 (0.92-1.06) | .73 |  | 0.95 (0.81-1.13) | .59 |  | 1.02 (0.86-1.20) | .83 |
| L_S_front_inf | 0.97 (0.91-1.04) | .41 |  | 0.97 (0.82-1.14) | .71 |  | 0.93 (0.79-1.10) | .38 |
| L_S_front_middle | 0.99 (0.93-1.06) | .82 |  | 0.97 (0.82-1.14) | .69 |  | 1.00 (0.85-1.18) | .97 |
| L_S_front_sup | 0.96 (0.89-1.02) | .19 |  | 0.97 (0.83-1.14) | .71 |  | 0.87 (0.73-1.03) | .10 |
| L_S_oc_middle_and_Lunatus | 1.06 (0.99-1.13) | .11 |  | 1.06 (0.89-1.25) | .52 |  | 1.14 (0.96-1.34) | .13 |
| L_S_oc_sup_and_transversal | 1.09 (1.01-1.16) | .02 |  | 0.95 (0.80-1.12) | .51 |  | 1.10 (0.93-1.29) | .27 |
| L_S_postcentral | 0.96 (0.90-1.03) | .24 |  | 1.01 (0.85-1.18) | .95 |  | 0.87 (0.73-1.03) | .10 |
| L_S_precentral_sup_part | 0.97 (0.91-1.04) | .35 |  | 1.03 (0.87-1.21) | .74 |  | 0.92 (0.78-1.09) | .32 |
| L_S_suborbital | 0.97 (0.91-1.04) | .43 |  | 0.90 (0.76-1.06) | .19 |  | 0.89 (0.75-1.05) | .15 |
| R_G_and_S_occipital_inf | 1.08 (1.01-1.16) | .03 |  | 0.87 (0.73-1.03) | .12 |  | 1.17 (1.00-1.37) | .06 |
| R_G_and_S_paracentral | 0.97 (0.91-1.04) | .39 |  | 0.92 (0.78-1.08) | .31 |  | 0.86 (0.73-1.01) | .07 |
| R_G_and_S_cingul_Ant | 1.08 (1.01-1.16) | .03 |  | 1.33 (1.12-1.58) | <0.001 |  | 1.20 (1.01-1.43) | .04 |
| R_G_and_S_cingul_Mid_Ant | 0.98 (0.92-1.05) | .56 |  | 0.92 (0.78-1.08) | .32 |  | 0.94 (0.80-1.11) | .45 |
| R_G_front_middle | 0.97 (0.90-1.04) | .35 |  | 0.98 (0.83-1.16) | .83 |  | 0.90 (0.76-1.06) | .22 |
| R_G_oc_temp_med_Parahip | 1.00 (0.93-1.07) | .98 |  | 0.90 (0.76-1.06) | .20 |  | 0.99 (0.84-1.17) | .90 |
| R_G_pariet_inf_Angular | 0.95 (0.89-1.02) | .16 |  | 0.93 (0.79-1.09) | .36 |  | 0.93 (0.79-1.10) | .39 |
| R_G_parietal_sup | 1.03 (0.96-1.10) | .46 |  | 1.07 (0.91-1.27) | .42 |  | 1.05 (0.89-1.24) | .59 |
| R_G_precuneus | 1.00 (0.93-1.07) | .97 |  | 1.05 (0.89-1.24) | .56 |  | 1.01 (0.86-1.20) | .87 |
| R_G_temporal_middle | 0.98 (0.92-1.05) | .65 |  | 0.99 (0.84-1.16) | .86 |  | 0.94 (0.80-1.11) | .49 |
| R_S_cingul_Marginalis | 0.98 (0.92-1.05) | .65 |  | 0.99 (0.84-1.16) | .86 |  | 0.96 (0.82-1.14) | .65 |
| R_S_circular_insula_ant | 0.95 (0.89-1.02) | .15 |  | 1.06 (0.90-1.24) | .50 |  | 0.88 (0.74-1.04) | .15 |
| R_S_front_inf | 1.01 (0.94-1.08) | .85 |  | 0.91 (0.77-1.07) | .26 |  | 0.98 (0.83-1.16) | .83 |
| R_S_front_sup | 0.91 (0.85-0.97) | .01 |  | 0.79 (0.67-0.93) | <0.001 |  | 0.87 (0.74-1.03) | .10 |
| R_S_intrapariet_and_P_trans | 1.02 (0.95-1.09) | .61 |  | 1.03 (0.87-1.21) | .77 |  | 1.03 (0.87-1.21) | .77 |
| R_S_occipital_ant | 1.06 (0.99-1.14) | .08 |  | 1.01 (0.85-1.19) | .95 |  | 1.24 (1.06-1.47) | .01 |
| R_S_pericallosal | 1.02 (0.95-1.09) | .62 |  | 1.13 (0.95-1.34) | .16 |  | 1.10 (0.93-1.31) | .27 |
| R_S_precentral_inf_part | 0.99 (0.92-1.06) | .69 |  | 0.94 (0.80-1.11) | .45 |  | 0.93 (0.79-1.10) | .41 |
| R_S_precentral_sup_part | 0.96 (0.90-1.03) | .24 |  | 0.84 (0.71-0.99) | .03 |  | 0.88 (0.75-1.04) | .12 |
| R_S_subparietal | 1.05 (0.98-1.12) | .21 |  | 1.07 (0.90-1.27) | .43 |  | 1.08 (0.92-1.28) | .34 |
| R_posterior thalamus | 0.93 (0.87-0.99) | .03 |  | 0.92 (0.78-1.09) | .33 |  | 0.87 (0.74-1.02) | .09 |
| R_anterior thalamus | 0.90 (0.84-0.97) | <0.001 |  | 0.91 (0.77-1.06) | .23 |  | 0.79 (0.67-0.94) | .01 |
| R_globus pallidus | 0.97 (0.91-1.04) | .40 |  | 0.94 (0.80-1.10) | .43 |  | 0.89 (0.76-1.05) | .18 |
| L_posterior thalamus | 1.02 (0.95-1.09) | .55 |  | 1.25 (1.05-1.47) | .01 |  | 1.09 (0.92-1.29) | .33 |
| L_anterior thalamus | 0.94 (0.88-1.01) | .07 |  | 0.88 (0.75-1.04) | .14 |  | 0.85 (0.72-1.00) | .05 |
| L_putamen | 1.00 (0.93-1.07) | 1.00 |  | 0.94 (0.79-1.11) | .44 |  | 0.99 (0.84-1.16) | .87 |
| L_caudate nucleus | 0.94 (0.88-1.00) | .06 |  | 0.99 (0.84-1.17) | .93 |  | 0.91 (0.77-1.07) | .26 |
| *All p values were two-sided, and no adjustments were made for multiple comparisons. | | | | | | | | |

| **eTable 15. Associations of SF coupling of brain regions affected by age of smoking initiation with incident anxiety** | | | | | | | | |
| --- | --- | --- | --- | --- | --- | --- | --- | --- |
| **Brain region** | **Linear association between SF coupling and incident anxiety** | |  | **Associations between SF coupling tertile and incident anxiety** | | | | |
| **HR (95% CI)** | ***p* value*** |  | **Middle tertile** | |  | **Highest tertile** | |
|  | **HR (95% CI)** | ***p* value*** |  | **HR (95% CI)** | ***p* value*** |
| L_G_and_S_paracentral | 1.00 (0.94-1.07) | .93 |  | 0.97 (0.83-1.14) | .71 |  | 0.94 (0.80-1.11) | .46 |
| L_G_and_S_transv_frontopol | 0.94 (0.88-1.01) | .07 |  | 0.99 (0.84-1.16) | .86 |  | 0.88 (0.74-1.03) | .11 |
| L_G_front_middle | 0.97 (0.91-1.04) | .36 |  | 0.95 (0.81-1.12) | .54 |  | 1.00 (0.85-1.17) | .98 |
| L_G_front_sup | 1.00 (0.94-1.07) | .97 |  | 0.99 (0.84-1.16) | .86 |  | 1.04 (0.89-1.22) | .64 |
| L_G_Ins_lg_and_S_cent_ins | 1.03 (0.97-1.10) | .34 |  | 0.94 (0.80-1.11) | .47 |  | 1.05 (0.90-1.24) | .51 |
| L_G_insular_short | 1.00 (0.93-1.06) | .89 |  | 0.99 (0.84-1.16) | .86 |  | 0.99 (0.85-1.17) | .94 |
| L_G_parietal_sup | 0.98 (0.92-1.05) | .57 |  | 1.06 (0.90-1.24) | .49 |  | 0.97 (0.82-1.14) | .72 |
| L_G_postcentral | 1.02 (0.95-1.09) | .55 |  | 1.06 (0.91-1.25) | .45 |  | 0.95 (0.81-1.12) | .57 |
| L_G_precentral | 1.04 (0.97-1.11) | .29 |  | 1.00 (0.85-1.18) | 1.00 |  | 0.99 (0.84-1.16) | .92 |
| L_G_precuneus | 0.98 (0.91-1.05) | .50 |  | 0.97 (0.82-1.14) | .69 |  | 1.02 (0.87-1.20) | .80 |
| L_G_temp_sup_G_T_transv | 1.03 (0.96-1.10) | .39 |  | 0.94 (0.80-1.11) | .47 |  | 1.00 (0.85-1.17) | 1.00 |
| L_G_temp_sup_Lateral | 1.04 (0.97-1.11) | .25 |  | 1.16 (0.99-1.37) | .07 |  | 1.08 (0.92-1.27) | .37 |
| L_S_central | 1.09 (1.02-1.17) | .01 |  | 1.15 (0.98-1.35) | .10 |  | 1.15 (0.98-1.36) | .09 |
| L_S_cingul_Marginalis | 0.99 (0.93-1.06) | .87 |  | 0.98 (0.84-1.16) | .84 |  | 1.01 (0.86-1.19) | .86 |
| L_S_circular_insula_ant | 0.99 (0.92-1.05) | .68 |  | 1.04 (0.88-1.22) | .67 |  | 1.06 (0.90-1.25) | .46 |
| L_S_front_inf | 1.00 (0.94-1.07) | .91 |  | 0.92 (0.78-1.08) | .29 |  | 0.94 (0.80-1.10) | .45 |
| L_S_front_middle | 0.96 (0.90-1.02) | .23 |  | 1.05 (0.89-1.23) | .56 |  | 0.91 (0.78-1.08) | .28 |
| L_S_front_sup | 0.99 (0.92-1.05) | .68 |  | 0.92 (0.78-1.08) | .29 |  | 1.00 (0.86-1.18) | .97 |
| L_S_oc_middle_and_Lunatus | 1.03 (0.96-1.10) | .38 |  | 1.05 (0.90-1.24) | .52 |  | 1.07 (0.91-1.26) | .38 |
| L_S_oc_sup_and_transversal | 1.03 (0.97-1.11) | .33 |  | 0.94 (0.80-1.11) | .48 |  | 1.00 (0.85-1.17) | .98 |
| L_S_postcentral | 0.96 (0.90-1.03) | .24 |  | 1.05 (0.89-1.23) | .58 |  | 0.90 (0.77-1.06) | .22 |
| L_S_precentral_sup_part | 0.99 (0.93-1.06) | .82 |  | 1.00 (0.85-1.17) | .98 |  | 0.96 (0.82-1.13) | .65 |
| L_S_suborbital | 1.00 (0.94-1.07) | .98 |  | 0.91 (0.77-1.07) | .26 |  | 1.02 (0.87-1.19) | .85 |
| R_G_and_S_occipital_inf | 0.96 (0.90-1.03) | .24 |  | 0.92 (0.78-1.08) | .29 |  | 0.93 (0.80-1.10) | .41 |
| R_G_and_S_paracentral | 0.95 (0.89-1.01) | .11 |  | 0.94 (0.80-1.11) | .48 |  | 0.92 (0.79-1.08) | .33 |
| R_G_and_S_cingul_Ant | 1.02 (0.95-1.09) | .59 |  | 0.99 (0.84-1.16) | .89 |  | 1.05 (0.89-1.24) | .54 |
| R_G_and_S_cingul_Mid_Ant | 0.98 (0.92-1.05) | .57 |  | 0.93 (0.79-1.09) | .38 |  | 0.94 (0.80-1.10) | .46 |
| R_G_front_middle | 0.93 (0.87-0.99) | .02 |  | 0.96 (0.82-1.12) | .60 |  | 0.83 (0.71-0.98) | .03 |
| R_G_oc_temp_med_Parahip | 0.98 (0.92-1.05) | .56 |  | 1.00 (0.85-1.17) | .98 |  | 0.96 (0.81-1.13) | .60 |
| R_G_pariet_inf_Angular | 1.00 (0.94-1.07) | .98 |  | 1.00 (0.85-1.18) | 1.00 |  | 1.08 (0.92-1.27) | .35 |
| R_G_parietal_sup | 1.01 (0.95-1.08) | .71 |  | 1.11 (0.95-1.31) | .19 |  | 1.03 (0.88-1.22) | .71 |
| R_G_precuneus | 0.96 (0.90-1.02) | .22 |  | 1.18 (1.01-1.38) | .04 |  | 0.91 (0.77-1.08) | .27 |
| R_G_temporal_middle | 1.01 (0.94-1.08) | .78 |  | 0.99 (0.84-1.16) | .86 |  | 1.00 (0.85-1.18) | .99 |
| R_S_cingul_Marginalis | 0.97 (0.91-1.04) | .42 |  | 0.93 (0.79-1.10) | .40 |  | 0.94 (0.80-1.11) | .47 |
| R_S_circular_insula_ant | 0.95 (0.89-1.01) | .09 |  | 0.94 (0.80-1.10) | .45 |  | 0.84 (0.72-0.99) | .04 |
| R_S_front_inf | 1.00 (0.93-1.07) | .96 |  | 0.91 (0.78-1.08) | .28 |  | 1.02 (0.87-1.20) | .78 |
| R_S_front_sup | 0.90 (0.84-0.96) | <0.001 |  | 0.81 (0.69-0.95) | .01 |  | 0.81 (0.69-0.94) | .01 |
| R_S_intrapariet_and_P_trans | 0.94 (0.88-1.00) | .05 |  | 0.95 (0.81-1.11) | .51 |  | 0.90 (0.77-1.06) | .22 |
| R_S_occipital_ant | 1.04 (0.97-1.11) | .24 |  | 1.01 (0.86-1.19) | .86 |  | 1.07 (0.91-1.25) | .42 |
| R_S_pericallosal | 0.97 (0.91-1.03) | .34 |  | 0.93 (0.79-1.10) | .40 |  | 0.92 (0.78-1.08) | .31 |
| R_S_precentral_inf_part | 0.92 (0.87-0.99) | .02 |  | 0.96 (0.82-1.13) | .63 |  | 0.84 (0.71-0.99) | .03 |
| R_S_precentral_sup_part | 0.92 (0.86-0.98) | .01 |  | 0.90 (0.77-1.05) | .19 |  | 0.84 (0.72-0.99) | .04 |
| R_S_subparietal | 0.97 (0.91-1.04) | .37 |  | 1.00 (0.85-1.17) | 1.00 |  | 0.95 (0.81-1.12) | .52 |
| R_posterior thalamus | 0.99 (0.93-1.06) | .86 |  | 1.09 (0.92-1.28) | .32 |  | 1.07 (0.91-1.25) | .44 |
| R_anterior thalamus | 0.94 (0.88-1.01) | .09 |  | 1.00 (0.85-1.17) | .97 |  | 0.95 (0.81-1.12) | .56 |
| R_globus pallidus | 0.96 (0.90-1.03) | .28 |  | 0.88 (0.75-1.03) | .12 |  | 0.90 (0.77-1.05) | .18 |
| L_posterior thalamus | 1.03 (0.96-1.10) | .44 |  | 1.19 (1.01-1.40) | .03 |  | 1.12 (0.95-1.31) | .19 |
| L_anterior thalamus | 0.98 (0.92-1.05) | .65 |  | 0.94 (0.80-1.10) | .45 |  | 0.95 (0.81-1.12) | .57 |
| L_putamen | 0.98 (0.92-1.05) | .64 |  | 1.00 (0.86-1.18) | .95 |  | 0.96 (0.82-1.13) | .63 |
| L_caudate nucleus | 0.96 (0.90-1.03) | .25 |  | 0.99 (0.85-1.16) | .93 |  | 0.90 (0.77-1.06) | .22 |
| *All p values were two-sided, and no adjustments were made for multiple comparisons. | | | | | | | | |

| **eTable 16. Mediating effect of brain SF coupling in critical regions on the relationship between age of smoking initiation and incident depression** | | | | | | | | | |
| --- | --- | --- | --- | --- | --- | --- | --- | --- | --- |
| **Smoking initiation age** | **Brain region mediator** | **Proportion Mediated (%)** | | | | **β a** | ***p* value a** | **HR b** | ***p* value b** |
| **Value** | **95% CI (Lower)** | **95% CI**  **(Upper)** | ***p* value** |
| Childhood | L_S_oc_sup_and_transversal | 0.77 | -0.15 | 2.30 | .10 | .05 | .09 | 2.31 | 7.45x10-6 |
| vs. | R_G_and_S_occipital_inf | 0.96 | -0.29 | 2.71 | .20 | .11 | 2.15x10-4 | 1.35 | 8.30x10-6 |
| Never smokers | R_G_and_S_cingul_Ant | -0.18 | -1.55 | 0.64 | .50 | -.01 | .63 | 1.62 | 6.81x10-6 |
|  | R_S_front_sup | 0.64 | -0.12 | 2.71 | .14 | -.05 | .07 | 0.60 | 8.38x10-6 |
|  | R_posterior thalamus | 0.81 | -0.12 | 3.20 | .22 | -.06 | .04 | 0.57 | 8.46x10-6 |
|  | R_anterior thalamus | 2.43 | 0.86 | 7.19 | .02 | -.13 | 8.30x10-6 | 0.44 | 1.22x10-5 |
|  |  |  |  |  |  |  |  |  |  |
| Adolescence | L_S_oc_sup_and_transversal | 0.46 | -0.11 | 1.94 | .30 | .02 | .14 | 1.82 | 5.69x10-5 |
| vs. | R_G_and_S_occipital_inf | 0.55 | -0.18 | 1.64 | .18 | .02 | .10 | 1.50 | 5.80x10-5 |
| Never smokers | R_G_and_S_cingul_Ant | -0.73 | -2.14 | 0.34 | .20 | -.05 | 2.32x10-3 | 1.40 | 4.83x10-5 |
|  | R_S_front_sup | 1.44 | 0.21 | 3.61 | .02 | -.06 | 2.92x10-4 | 0.54 | 6.97x10-5 |
|  | R_posterior thalamus | 1.55 | 0.21 | 3.17 | .02 | -.05 | 6.83x10-4 | 0.51 | 7.16x10-5 |
|  | R_anterior thalamus | 1.60 | 0.30 | 4.59 | .02 | -.05 | 6.93x10-4 | 0.47 | 6.99x10-5 |
|  |  |  |  |  |  |  |  |  |  |
| Adulthood | L_S_oc_sup_and_transversal | 1.72 | -3.00 | 18.00 | .12 | .07 | 1.91x10-3 | 1.81 | .03 |
| vs. | R_G_and_S_occipital_inf | 0.84 | -1.53 | 7.94 | .38 | .03 | .18 | 1.52 | .03 |
| Never smokers | R_G_and_S_cingul_Ant | -0.89 | -5.61 | 1.07 | .36 | -.05 | .02 | 1.37 | .02 |
|  | R_S_front_sup | 1.68 | -0.74 | 7.89 | .10 | -.05 | .02 | 0.54 | .03 |
|  | R_posterior thalamus | 1.41 | -0.04 | 5.81 | .06 | -.04 | .07 | 0.52 | .03 |
|  | R_anterior thalamus | 1.82 | -11.46 | 7.08 | .08 | -.05 | .02 | 0.51 | .03 |
| a. Effect of the first half of the mediation pathway; b. Effect of the second half of the mediation pathway. | | | | | | | | | |  |
|  | | | | | | | | | |  |

| **eTable 17. Mediating effect of critical SF coupling markers on the relationship between age of smoking initiation and incident anxiety** | | | | | | | | | | |
| --- | --- | --- | --- | --- | --- | --- | --- | --- | --- | --- |
| **Smoking initiation age** | **Brain region mediator** | **Proportion Mediated (%)** | | | | **β a** | ***p* value a** | **HR b** | | ***p* value b** |
| **Value** | **95% CI (Lower)** | **95% CI**  **(Upper)** | ***p* value** |
| Childhood | L_S_central | -1.67 | -17.86 | 6.92 | .26 | -.07 | .02 | 1.41 | | .13 |
| vs. | R_G_front_middle | 2.69 | -9.71 | 47.83 | .16 | -.08 | 3.32x10-3 | 0.59 | | .15 |
| Never smokers | R_S_front_sup | 2.19 | -44.23 | 20.78 | .26 | -.05 | .07 | 0.57 | | .15 |
|  | R_S_precentral_inf_part | 3.36 | -9.88 | 27.40 | .20 | -.07 | .02 | 0.52 | | .16 |
|  | R_S_precentral_sup_part | 2.04 | -12.36 | 15.49 | .20 | -.08 | 5.51x10-3 | 0.70 | | .15 |
|  |  |  |  |  |  |  |  |  | |  |
| Adolescence | L_S_central | -1.25 | -4.44 | -0.08 | .04 | -.05 | 2.65x10-3 | 1.60 | | 2.94x10-4 |
| vs. | R_G_front_middle | 1.22 | -0.70 | 3.78 | .28 | -.08 | 2.75x10-7 | 0.73 | | 4.11x10-4 |
| Never smokers | R_S_front_sup | 1.83 | 0.40 | 5.30 | <0.001 | -.06 | 2.92x10-4 | 0.58 | | 4.51x10-4 |
|  | R_S_precentral_inf_part | 2.39 | 0.32 | 7.01 | .04 | -.09 | 1.59x10-8 | 0.64 | | 4.92x10-4 |
|  | R_S_precentral_sup_part | 1.30 | 0.11 | 3.35 | .02 | -.06 | 2.86x10-4 | 0.68 | | 4.12x10-4 |
|  |  |  |  |  |  |  |  |  | |  |
| Adulthood | L_S_central | -1.00 | -10.19 | 0.45 | .24 | -.05 | .03 | 1.41 | | .02 |
| vs. | R_G_front_middle | 0.93 | -2.52 | 5.98 | .38 | -.07 | 7.59x10-4 | 0.78 | | .02 |
| Never smokers | R_S_front_sup | 1.94 | -2.19 | 14.17 | .06 | -.05 | .02 | 0.55 | | .02 |
|  | R_S_precentral_inf_part | 1.32 | -0.08 | 9.34 | .08 | -.04 | .05 | 0.62 | | .02 |
|  | R_S_precentral_sup_part | 1.03 | -0.47 | 5.40 | .06 | -.05 | .02 | 0.73 | | .02 |
| a. Effect of the first half of the mediation pathway; b. Effect of the second half of the mediation pathway. | | | | | | | | |  | |

| **eTable 18. Significant associations between inflammatory markers and SF coupling in regions affected by in utero tobacco exposure** | | | | |
| --- | --- | --- | --- | --- |
| **Inflammation marker** | **Brain region** | ***b* value** | ***p* value** | ***p*-FDR*** |
| CRP | L_G_pariet_inf_Angular | -0.02 | <2x10-16 | <2x10-16 |
|  | R_G_oc_temp_med_Lingual | 0.02 | <2x10-16 | <2x10-16 |
|  | L_S_temporal_sup | -0.03 | <2x10-16 | <2x10-16 |
|  | R_S_precentral_inf_part | -0.02 | 5.00x10-4 | 2.13x10-3 |
|  | L_G_oc_temp_med_Lingual | 0.02 | 8.00x10-4 | 2.72x10-3 |
|  | R_S_collat_transv_post | -0.01 | 7.60x10-3 | .02 |
|  | R_Lat_Fis_post | 0.01 | .01 | .03 |
|  | R_G_and_S_cingul_Mid_Post | 0.01 | .02 | .04 |
|  |  |  |  |  |
| Leukocyte | R_Lat_Fis_post | 0.02 | 2.00x10-4 | 3.40x10-3 |
|  | L_G_oc_temp_med_Lingual | 0.02 | 5.00x10-4 | 4.25x10-3 |
|  | L_S_temporal_sup | -0.02 | 1.90x10-3 | .01 |
|  | R_G_oc_temp_lat_fusifor | 0.02 | 2.40x10-3 | .01 |
|  | R_G_and_S_occipital_inf | 0.02 | 3.80x10-3 | .01 |
|  |  |  |  |  |
| Lymphocyte | R_S_precentral_inf_part | -0.02 | 1.20x10-3 | .02 |
|  | L_S_temporal_sup | -0.02 | 2.50x10-3 | .02 |
|  | R_G_and_S_cingul_Mid_Ant | 0.01 | 6.80x10-3 | .04 |
|  |  |  |  |  |
| Lymphocyte % | R_S_precentral_inf_part | -0.02 | 2.80x10-3 | .05 |
|  |  |  |  |  |
| Monocyte | R_Lat_Fis_post | 0.03 | <2x10-16 | <2x10-16 |
|  |  |  |  |  |
| Neutrophill | R_Lat_Fis_post | 0.02 | 6.00x10-4 | .01 |
|  | L_G_oc_temp_med_Lingual | 0.02 | 3.10x10-3 | .03 |
| *All p values were two-sided. The *p*-FDR values were calculated using the Benjamini-Hochberg FDR method. | | | | |

| **eTable 19.** **Mediating effect of inflammation markers on the relationship between in utero exposure to tobacco and SF coupling in critical regions** | | | | | | | | | | |
| --- | --- | --- | --- | --- | --- | --- | --- | --- | --- | --- |
| **Inflammation mediator** | **Brain region** | **Proportion Mediated (%)** | | | | | **β a** | ***p* value a** | **β b** | ***p* value b** | |
| **Value** | **95 CI (Lower)** | **95 CI**  **(Upper)** | | ***p* value** |
| CRP | L_G_pariet_inf_Angular | 2.05 | 0.75 | 5.13 | <0.001 | | .05 | 3.95x10-5 | -.020 | 2.72x10-4 | |
|  | R_G_oc_temp_med_Lingual | 1.22 | 0.43 | 2.56 | <0.001 | | .05 | 3.95x10-5 | .019 | 6.67x10-4 | |
|  | L_S_temporal_sup | 2.80 | 0.97 | 9.44 | 5.00x10-3 | | .05 | 3.95x10-5 | -.021 | 1.98x10-4 | |
|  | R_S_precentral_inf_part | 2.99 | 0.90 | 12.75 | .01 | | .05 | 3.95x10-5 | -.019 | 6.65x10-4 | |
|  | L_G_oc_temp_med_Lingual | 0.70 | 0.21 | 1.46 | 3.00x10-3 | | .05 | 3.95x10-5 | .016 | 3.81x10-3 | |
|  | R_S_collat_transv_post | -1.87 | -8.32 | -0.17 | .03 | | .05 | 3.95x10-5 | -.012 | .03 | |
|  |  |  |  |  |  | |  |  |  |  | |
| Leukocyte | R_Lat_Fis_post | 1.17 | 0.19 | 3.30 | .02 | | 7.24x10-3 | .02 | .085 | 2.30x10-4 | |
|  | L_G_oc_temp_med_Lingual | 0.41 | 0.05 | 1.03 | .02 | | 7.24x10-3 | .02 | .067 | 3.56x10-3 | |
|  | L_S_temporal_sup | 1.34 | 0.18 | 4.30 | .02 | | 7.24x10-3 | .02 | -.080 | 5.00x10-4 | |
|  | R_G_oc_temp_lat_fusifor | 1.10 | 0.09 | 3.96 | .02 | | 7.24x10-3 | .02 | .063 | 6.47x10-3 | |
|  | R_G_and_S_occipital_inf | 1.10 | 0.01 | 5.59 | .05 | | 7.24x10-3 | .02 | .051 | .03 | |
|  |  |  |  |  |  | |  |  |  |  | |
| Lymphocyte | R_S_precentral_inf_part | 2.11 | 0.46 | 8.93 | .02 | | 9.00x10-3 | 2.04x10-4 | -.081 | 4.92x10-3 | |
|  | L_S_temporal_sup | 1.50 | 0.25 | 4.64 | .01 | | 9.00x10-3 | 2.04x10-4 | -.073 | .01 | |
|  | R_G_and_S_cingul_Mid_Ant | -1.45 | -4.64 | -0.23 | .02 | | 9.00x10-3 | 2.04x10-4 | .070 | .02 | |
|  |  |  |  |  |  | |  |  |  |  | |
| Monocyte | R_Lat_Fis_post | 1.46 | 0.32 | 3.86 | 9.00x10-3 | | 3.31x10-3 | 9.85x10-3 | .231 | 2.21x10-5 | |
| a. Effect of the first half of the mediation pathway; b. Effect of the second half of the mediation pathway. | | | | | | | | | | |  | |
|  | | | | | | | | | | |  | |

| **eTable 20. Significant associations between inflammatory markers and SF coupling in regions affected by age of smoking initiation** | | | | |
| --- | --- | --- | --- | --- |
| **Inflammation marker** | **Brain region** | ***b* value** | ***p* value** | ***p*-FDR*** |
| CRP | R_G_front_middle | -0.02 | <2x10-16 | <2x10-16 |
|  | R_G_pariet_inf_Angular | -0.03 | <2x10-16 | <2x10-16 |
|  | L_S_precentral_sup_part | -0.02 | <2x10-16 | <2x10-16 |
|  | R_S_front_inf | -0.03 | <2x10-16 | <2x10-16 |
|  | L_S_front_inf | -0.02 | <2x10-16 | <2x10-16 |
|  | R_S_precentral_sup_part | -0.02 | 1.00x10-4 | 5.56x10-4 |
|  | R_S_occipital_ant | 0.02 | 1.00x10-4 | 5.56x10-4 |
|  | L_G_precentral | -0.02 | 1.00x10-4 | 5.56x10-4 |
|  | L_G_temp_sup_Lateral | -0.02 | 1.00x10-4 | 5.56x10-4 |
|  | R_S_front_sup | -0.02 | 4.00x10-4 | 2.00x10-3 |
|  | R_S_precentral_inf_part | -0.02 | 5.00x10-4 | 2.27x10-3 |
|  | L_S_front_sup | -0.02 | 1.50x10-3 | 6.15x10-3 |
|  | L_S_oc_sup_and_transversal | 0.02 | 1.60x10-3 | 6.15x10-3 |
|  | R_G_and_S_cingul_Ant | 0.02 | 2.20x10-3 | 7.86x10-3 |
|  | R_S_subparietal | 0.02 | 4.30x10-3 | .01 |
|  | L_G_front_middle | -0.01 | .01 | .04 |
|  | L_S_suborbital | -0.01 | .01 | .04 |
|  |  |  |  |  |
| Leukocyte | L_S_precentral_sup_part | -0.02 | 4.00x10-4 | .01 |
|  | R_S_precentral_sup_part | -0.02 | 4.00x10-4 | .01 |
|  | R_G_pariet_inf_Angular | -0.02 | 1.60x10-3 | .02 |
|  | R_G_and_S_paracentral | -0.02 | 1.90x10-3 | .02 |
|  | R_G_and_S_occipital_inf | 0.02 | 3.80x10-3 | .03 |
|  | L_caudate nucleus | -0.01 | 4.70x10-3 | .03 |
|  | R_G_front_middle | -0.01 | 4.70x10-3 | .03 |
|  | L_S_oc_middle_and_Lunatus | 0.01 | 5.20x10-3 | .03 |
|  |  |  |  |  |
| Lymphocyte | R_S_front_inf | -0.02 | <2x10-16 | <2x10-16 |
|  | R_G_front_middle | -0.02 | 5.00x10-4 | .01 |
|  | R_S_precentral_inf_part | -0.02 | 1.20x10-3 | .01 |
|  | L_S_precentral_sup_part | -0.02 | 1.30x10-3 | .01 |
|  | R_S_precentral_sup_part | -0.02 | 1.40x10-3 | .01 |
|  | R_G_pariet_inf_Angular | -0.02 | 1.70x10-3 | .01 |
|  | R_G_and_S_cingul_Mid_Ant | 0.01 | 6.80x10-3 | .05 |
|  |  |  |  |  |
| Lymphocyte % | L_G_temp_sup_G_T_transv | 0.02 | 6.00x10-4 | .03 |
|  |  |  |  |  |
| Monocyte | R_S_precentral_sup_part | -0.02 | 1.10x10-3 | .03 |
|  | L_S_oc_sup_and_transversal | 0.02 | 1.30x10-3 | .03 |
|  | L_caudate nucleus | -0.02 | 1.50x10-3 | .03 |
|  |  |  |  |  |
| Neutrophill % | L_G_temp_sup_G_T_transv | -0.02 | 9.00x10-4 | .05 |
|  |  |  |  |  |
| Platelet | R_S_front_sup | -0.02 | 8.00x10-4 | .02 |
|  | R_G_pariet_inf_Angular | -0.02 | 1.30x10-3 | .02 |
|  | L_G_temp_sup_G_T_transv | -0.02 | 1.40x10-3 | .02 |
| *All p values were two-sided. The *p*-FDR values were calculated using the Benjamini-Hochberg FDR method. | | | | |

| **eTable 21.** **Mediating effect of inflammatory markers on the relationship between childhood smoking initiation and SF coupling in critical regions** | | | | | | | | | | | |
| --- | --- | --- | --- | --- | --- | --- | --- | --- | --- | --- | --- |
| **Inflammation mediator** | **Brain region** | **Proportion Mediated (%)** | | | | | **β a** | ***p* value a** | **β b** | ***p* value b** |
| **Value** | **95 CI (Lower)** | **95 CI**  **(Upper)** | | ***p* value** |
| CRP | R_G_front_middle | 7.60 | 2.46 | 30.61 | 9.00x10-3 | | .30 | 2.96x10-23 | -.021 | 1.52x10-3 |
|  | R_G_pariet_inf_Angular | 9.97 | 2.60 | 49.31 | .03 | | .30 | 2.96x10-23 | -.023 | 4.33x10-4 |
|  | L_S_precentral_sup_part | 9.26 | 3.84 | 32.48 | 9.00x10-3 | | .30 | 2.96x10-23 | -.027 | 5.71x10-5 |
|  | R_S_front_inf | 9.52 | 4.07 | 33.28 | 9.00x10-3 | | .30 | 2.96x10-23 | -.028 | 3.09x10-5 |
|  | L_S_front_inf | 5.06 | 0.98 | 15.93 | .01 | | .30 | 2.96x10-23 | -.016 | .01 |
|  | R_S_precentral_sup_part | 11.69 | 4.06 | 56.58 | .03 | | .30 | 2.96x10-23 | -.028 | 2.32x10-5 |
|  | R_S_occipital_ant | 7.06 | 2.10 | 26.65 | 4.00x10-3 | | .30 | 2.96x10-23 | .019 | 4.22x10-3 |
|  | L_G_precentral | 5.79 | 1.76 | 17.47 | <0.001 | | .30 | 2.96x10-23 | -.019 | 3.43x10-3 |
|  | L_G_temp_sup_Lateral | 8.98 | 2.78 | 44.50 | .02 | | .30 | 2.96x10-23 | -.022 | 7.78x10-4 |
|  | R_S_front_sup | 8.89 | 2.95 | 40.80 | .02 | | .30 | 2.96x10-23 | -.023 | 5.75x10-3 |
|  | R_S_precentral_inf_part | 7.65 | 0.19 | 51.70 | .05 | | .30 | 2.96x10-23 | .016 | .01 |
|  | L_S_front_sup | 7.60 | 2.46 | 30.61 | 9.00x10-3 | | .30 | 2.96x10-23 | -.021 | 6.07x10-4 |
|  | L_S_oc_sup_and_transversal | 9.97 | 2.60 | 49.31 | .03 | | .30 | 2.96x10-23 | -.023 | .02 |
|  |  |  |  |  |  | |  |  |  |  |
| Leukocyte | L_S_precentral_sup_part | 3.91 | 0.16 | 11.67 | .05 | | .07 | 4.03x10-23 | -.057 | .04 |
|  | R_G_pariet_inf_Angular | 6.81 | 0.78 | 31.64 | .03 | | .07 | 4.03x10-23 | -.072 | 9.69x10-3 |
|  | R_G_and_S_occipital_inf | 5.69 | 2.03 | 14.07 | <0.001 | | .07 | 4.03x10-23 | .089 | 1.26x10-3 |
|  |  |  |  |  |  | |  |  |  |  |
| Lymphocyte | R_S_front_inf | 5.51 | 1.54 | 17.16 | .01 | | .05 | 3.47x10-18 | -.103 | 2.77x10-3 |
|  | R_G_front_middle | 6.25 | 2.07 | 20.14 | .01 | | .05 | 3.47x10-18 | -.113 | 1.06x10-3 |
|  | L_S_precentral_sup_part | 3.81 | 0.49 | 11.03 | .02 | | .05 | 3.47x10-18 | -.080 | .02 |
|  | R_G_pariet_inf_Angular | 5.78 | 0.69 | 27.07 | .03 | | .05 | 3.47x10-18 | -.086 | .01 |
|  |  |  |  |  |  | |  |  |  |  |
| Monocyte | R_S_precentral_sup_part | 5.26 | 1.14 | 19.17 | .01 | | .02 | 1.03x10-16 | -.176 | 6.29x10-3 |
|  | L_caudate nucleus | 4.23 | 0.74 | 13.27 | .01 | | .02 | 1.03x10-16 | -.159 | .01 |
| a. Effect of the first half of the mediation pathway; b. Effect of the second half of the mediation pathway. | | | | | | | | | | | |

| **eTable 22. Mediating effect of inflammatory markers on the relationship between adolescence smoking initiation and SF coupling in critical regions** | | | | | | | | | |
| --- | --- | --- | --- | --- | --- | --- | --- | --- | --- |
| **Inflammation mediator** | **Brain region** | **Proportion Mediated (%)** | | | | **β a** | ***p* value a** | **β b** | ***p* value b** | |
| **Value** | **95 CI (Lower)** | **95 CI**  **(Upper)** | ***p* value** |
| CRP | R_G_front_middle | 4.97 | 2.17 | 9.73 | <0.001 | .19 | 7.63x10-33 | -.022 | 3.68x10-4 | |
|  | R_G_pariet_inf_Angular | 11.22 | 4.79 | 42.46 | .01 | .19 | 7.63x10-33 | -.026 | 2.81x10-5 | |
|  | L_S_precentral_sup_part | 8.49 | 4.26 | 19.87 | <0.001 | .19 | 7.63x10-33 | -.027 | 7.13x10-6 | |
|  | R_S_front_inf | 7.85 | 3.89 | 17.34 | <0.001 | .19 | 7.63x10-33 | -.027 | 1.17x10-5 | |
|  | L_S_front_inf | 6.71 | 1.36 | 25.55 | .02 | .19 | 7.63x10-33 | -.016 | 9.75x10-3 | |
|  | R_S_precentral_sup_part | 8.86 | 4.34 | 22.02 | <0.001 | .19 | 7.63x10-33 | -.027 | 1.17x10-5 | |
|  | R_S_front_sup | 6.83 | 2.96 | 16.42 | <0.001 | .19 | 7.63x10-33 | -.022 | 2.42x10-4 | |
|  | R_S_precentral_inf_part | 3.06 | 0.58 | 6.53 | .01 | .19 | 7.63x10-33 | -.015 | .01 | |
|  | L_S_front_sup | 6.38 | 2.59 | 15.19 | <0.001 | .19 | 7.63x10-33 | -.021 | 5.59x10-4 | |
|  | R_S_subparietal | -4.62 | -12.97 | -0.56 | .02 | .19 | 7.63x10-33 | .013 | .03 | |
|  | L_G_front_middle | 3.99 | 0.70 | 9.46 | .01 | .19 | 7.63x10-33 | -.015 | .02 | |
|  | L_S_suborbital | 3.42 | 0.20 | 8.46 | .04 | .19 | 7.63x10-33 | -.013 | .04 | |
|  |  |  |  |  |  |  |  |  |  | |
| Leukocyte | L_S_precentral_sup_part | 6.18 | 1.63 | 17.28 | .01 | .05 | 1.59x10-39 | -.069 | 6.12x10-3 | |
|  | R_S_precentral_sup_part | 5.40 | 0.94 | 14.69 | .02 | .05 | 1.59x10-39 | -.062 | .01 | |
|  | R_G_pariet_inf_Angular | 6.40 | 0.10 | 26.23 | .05 | .05 | 1.59x10-39 | -.054 | .03 | |
|  |  |  |  |  |  |  |  |  |  | |
| Lymphocyte | R_S_front_inf | 5.42 | 1.18 | 13.16 | .01 | .04 | 6.16x10-42 | -.082 | 8.72x10-3 | |
|  | R_G_front_middle | 5.15 | 1.94 | 10.03 | <0.001 | .04 | 6.16x10-42 | -.104 | 8.96x10-4 | |
|  | R_S_precentral_inf_part | 3.55 | 0.62 | 7.44 | .02 | .04 | 6.16x10-42 | -.077 | .01 | |
|  | L_S_precentral_sup_part | 7.31 | 2.38 | 19.17 | <0.001 | .04 | 6.16x10-42 | -.097 | 2.03x10-3 | |
|  | R_S_precentral_sup_part | 5.26 | 0.66 | 14.53 | .02 | .04 | 6.16x10-42 | -.072 | .02 | |
|  | R_G_pariet_inf_Angular | 8.28 | 1.77 | 32.87 | .02 | .04 | 6.16x10-42 | -.085 | 6.55x10-3 | |
|  | R_G_and_S_cingul_Mid_Ant | -4.16 | -10.71 | -0.25 | .04 | .04 | 6.16x10-42 | .064 | .04 | |
|  |  |  |  |  |  |  |  |  |  | |
| Lymphocyte % | L_G_temp_sup_G_T_transv | -1.39 | -4.57 | -0.21 | .02 | .37 | 8.17x10-4 | .002 | 0.01 | |
|  |  |  |  |  |  |  |  |  |  | |
| Monocyte | R_S_precentral_sup_part | 4.26 | 1.61 | 11.43 | <0.001 | .01 | 3.75x10-14 | -.200 | 7.88x10-4 | |
|  | L_caudate nucleus | 2.51 | 0.51 | 5.87 | .01 | .01 | 3.75x10-14 | -.151 | .01 | |
| a. Effect of the first half of the mediation pathway; b. Effect of the second half of the mediation pathway. | | | | | | | | | | |  |

| **eTable 23. Mediating effect of inflammatory markers on the relationship between adulthood smoking initiation and SF coupling in critical regions** | | | | | | | | | |
| --- | --- | --- | --- | --- | --- | --- | --- | --- | --- |
| **Inflammation mediator** | **Brain region** | **Proportion Mediated(%)** | | | | **β a** | ***p* value a** | **β b** | ***p* value b** | |
| **Value** | **95 CI (Lower)** | **95 CI**  **(Upper)** | ***p* value** |
| CRP | R_G_front_middle | 3.81 | 1.34 | 10.65 | <0.001 | .15 | 2.20x10-11 | -.020 | 1.75x10-3 | |
|  | R_G_pariet_inf_Angular | 5.28 | 2.33 | 15.55 | 1.00x10-3 | .15 | 2.20x10-11 | -.026 | 5.65x10-5 | |
|  | L_S_precentral_sup_part | 7.85 | 2.43 | 41.00 | .03 | .15 | 2.20x10-11 | -.027 | 3.62x10-5 | |
|  | R_S_precentral_sup_part | 7.68 | 2.57 | 36.77 | .03 | .15 | 2.20x10-11 | -.027 | 2.50x10-5 | |
|  | R_S_front_sup | 6.62 | 1.94 | 32.85 | .03 | .15 | 2.20x10-11 | -.023 | 2.95x10-4 | |
|  | L_S_front_sup | 4.82 | 1.65 | 16.92 | 7.00x10-3 | .15 | 2.20x10-11 | -.021 | 1.05x10-3 | |
|  | L_S_oc_sup_and_transversal | 3.66 | 0.99 | 10.83 | 4.00x10-3 | .15 | 2.20x10-11 | .018 | 6.71x10-3 | |
|  | R_S_subparietal | -4.07 | -14.74 | -0.83 | .02 | .15 | 2.20x10-11 | .017 | .01 | |
|  | L_G_front_middle | 2.37 | 0.34 | 6.14 | .02 | .15 | 2.20x10-11 | -.015 | 0.02 | |
|  | L_S_suborbital | 3.60 | 0.96 | 11.33 | 4.00x10-3 | .15 | 2.20x10-11 | -.018 | 6.55x10-3 | |
|  |  |  |  |  |  |  |  |  |  | |
| Leukocyte | R_G_pariet_inf_Angular | 4.43 | 1.19 | 13.71 | .01 | .04 | 7.46x10-15 | -.076 | 4.90x10-3 | |
|  | L_S_oc_middle_and_Lunatus | 4.12 | 0.66 | 15.00 | .02 | .04 | 7.46x10-15 | .064 | .02 | |
|  |  |  |  |  |  |  |  |  |  | |
| Lymphocyte | R_S_front_inf | 8.04 | 0.92 | 42.35 | .04 | .04 | 1.77x10-19 | -.102 | 2.53x10-3 | |
|  | R_G_front_middle | 5.63 | 2.05 | 15.13 | 1.00x10-3 | .04 | 1.77x10-19 | -.113 | 7.45x10-4 | |
|  | R_G_pariet_inf_Angular | 5.19 | 1.43 | 16.00 | 3.00x10-3 | .04 | 1.77x10-19 | -.097 | 3.94x10-3 | |
|  |  |  |  |  |  |  |  |  |  | |
| Monocyte | R_S_precentral_sup_part | 3.54 | 0.73 | 13.11 | .01 | .01 | 6.64x10-9 | -.169 | 7.56x10-3 | |
|  | L_S_oc_sup_and_transversal | 4.56 | 1.84 | 13.70 | <0.001 | .01 | 6.64x10-9 | .239 | 1.49x10-4 | |
|  | L_caudate nucleus | 2.07 | 0.28 | 5.44 | .02 | .01 | 6.64x10-9 | -.146 | .02 | |
| a. Effect of the first half of the mediation pathway; b. Effect of the second half of the mediation pathway. | | | | | | | | | |  | |
|  | | | | | | | | | |  | |

| **eTable 24. Interactive effects between in utero exposure to tobacco and age of smoking initiation on inflammatory markers** | | | | | | | | | | | | |
| --- | --- | --- | --- | --- | --- | --- | --- | --- | --- | --- | --- | --- |
| **Inflammation marker** | **Mean inflammation levels (95% CI)** | | | | | | | | |  | ***F* value a** | ***p* value*** |
| **Unexposed** | | | |  | **Exposed** | | | | |
| **Childhood** | **Adolescence** | **Adulthood** | **Never-smokers** |  | **Childhood** | **Adolescence** | **Adulthood** | **Never-smokers** | |
| CRP | 0.23 (0.21-0.25) | 0.16 (0.15-0.18) | 0.13 (0.12-0.15) | 0.02 (0.01-0.03) |  | 0.28 (0.26-0.30) | 0.21 (0.19-0.22) | 0.20 (0.17-0.22) | 0.04 (0.03-0.05) | | 5.15 | 1.47x10-3 |
| Leukocyte | 0.30 (0.28-0.32) | 0.18 (0.17-0.19) | 0.18 (0.16-0.19) | -0.06 (-0.07- -0.05) |  | 0.36 (0.33-0.38) | 0.24 (0.22-0.25) | 0.25 (0.22-0.27) | -0.06 (-0.07- -0.05) | | 21.74 | 4.54X10-14 |
| Lymphocyte | 0.21 (0.19-0.23) | 0.13 (0.12-0.15) | 0.16 (0.14-0.17) | -0.05 (-0.06- -0.04) |  | 0.25 (0.23-0.28) | 0.18 (0.16-0.19) | 0.18 (0.16-0.21) | -0.06 (-0.07- -0.05) | | 8.66 | 9.61x10-6 |
| Lymphocyte % | -0.024 (-0.046- -0.003) | -0.008 (-0.02-0.005) | 0.02 (0.01-0.04) | 0.004 (-0.005-0.01) |  | -0.04 (-0.06- -0.01) | -0.01 (-0.03-0.004) | -0.01 (-0.04-0.01) | -0.02 (-0.03- -0.007) | | 0.97 | .40 |
| Monocyte | 0.21 (0.19-0.23) | 0.14 (0.13-0.15) | 0.12 (0.10-0.14) | -0.01 (-0.02- -0.003) |  | 0.22 (0.20-0.25) | 0.17 (0.16-0.19) | 0.17 (0.15-0.19) | -0.007 (-0.01-0.004) | | 7.22 | 7.67x10-5 |
| Monocyte % | 0.002 (-0.02-0.02) | 0.02 (0.004-0.03) | -0.004 (-0.02-0.01) | 0.03 (0.02-0.04) |  | -0.04 (-0.06- -0.01) | 0.004 (-0.01-0.02) | -0.01 (-0.03-0.02) | 0.04 (0.03-0.05) | | 1.61 | .18 |
| Neutrophill | 0.26 (0.24-0.28) | 0.14 (0.13-0.15) | 0.13 (0.12-0.15) | -0.06 (-0.07- -0.05) |  | 0.32 (0.30-0.34) | 0.20 (0.18-0.21) | 0.20 (0.17-0.22) | -0.05 (-0.06- -0.04) | | 19.52 | 1.19x10-12 |
| Neutrophill % | 0.01 (-0.01-0.03) | -0.01 (-0.02-0.002) | -0.03 (-0.05- -0.02) | -0.02 (-0.03- -0.01) |  | 0.04 (0.01-0.06) | -0.001 (-0.02-0.01) | 0.0004 (-0.02-0.02) | 0.001 (-0.01-0.01) | | 1.29 | .28 |
| Platelet | 0.01 (-0.006-0.04) | -0.04 (-0.05- -0.03) | -0.04 (-0.06- -0.02) | -0.08 (-0.09- -0.07) |  | 0.01 (-0.01-0.03) | -0.02 (-0.04- -0.01) | -0.05 (-0.08- -0.03) | -0.09 (-0.10- -0.07) | | 2.80 | .04 |
| * All *p* values are two-sided. a. This is the F value for the 2x4 ANCOVA. | | | | | | | | | | | | |

| **eTable 25.** **Associations between age of smoking initiation and incident depression stratified by BMI, ethnicity, alcohol status, deprivation, and age** | | | | | | | | | |
| --- | --- | --- | --- | --- | --- | --- | --- | --- | --- |
| **Characteristic** | | **Childhood** | |  | **Adolescence** | |  | **Adulthood** | |
| **HR (95% CI)** | *p* interaction***** |  | **HR (95% CI)** | *p* interaction |  | **HR (95% CI)** | *p* interaction |
| BMI | Obesity | 1.59 (1.44-1.76) | 6.39x10-3 |  | 1.23 (1.14-1.32) | .06 |  | 1.21 (1.09-1.34) | 6.60x10-3 |
|  | Overweight | 2.06 (1.87-2.26) | 2.64x10-9 |  | 1.54 (1.45-1.64) | 4.10x10-10 |  | 1.41 (1.29-1.54) | 8.47x10-7 |
|  | Normal | 2.46 (2.18-2.78) | Reference |  | 1.66 (1.53-1.79) | Reference |  | 1.68 (1.51-1.86) | Reference |
| Ethnicity | White | 1.91 (1.80-2.03) | 9.52x10-3 |  | 1.43 (1.38-1.49) | 6.15x10-4 |  | 1.38 (1.30-1.46) | 3.24x10-6 |
|  | Ethnic minority | 2.93 (2.12-4.03) | Reference |  | 2.31 (1.85-2.88) | Reference |  | 1.97 (1.56-2.49) | Reference |
| Alcohol status | Alcohol use | 1.90 (1.78-2.02) | 2.25x10-3 |  | 1.43 (1.37-1.49) | 1.59x10-3 |  | 1.37 (1.29-1.46) | .02 |
|  | Never | 2.27 (1.91-2.69) | Reference |  | 1.66 (1.46-1.88) | Reference |  | 1.68 (1.42-1.99) | Reference |
| Deprivation | Higher | 2.12 (1.95-2.30) | 2.97x10-4 |  | 1.53 (1.44-1.63) | .07 |  | 1.44 (1.33-1.57) | .42 |
|  | Middle | 1.78 (1.59-2.00) | .35 |  | 1.37 (1.27-1.47) | .45 |  | 1.43 (1.29-1.58) | .49 |
|  | Lower | 1.71 (1.49-1.97) | Reference |  | 1.47 (1.36-1.59) | Reference |  | 1.36 (1.21-1.52) | Reference |
| Age | Older age | 1.70 (1.45.1.99) | .002 |  | 1.46 (1.34-1.59) | .26 |  | 1.27 (1.14-1.42) | .01 |
|  | Middle age | 2.00 (1.87-2.13) | Reference |  | 1.46 (1.39-1.53) | Reference |  | 1.46 (1.37-1.56) | Reference |
| * All *p* values are two-sided.*p* interaction were FDR-corrected, with significance defined as *p* < .05. | | | | | | | | | |

| **eTable 26. Associations between age of smoking initiation and incident anxiety stratified by deprivation, alcohol status and ethnicity** | | | | | | | | | |
| --- | --- | --- | --- | --- | --- | --- | --- | --- | --- |
| **Characteristic** | | **Childhood** | |  | **Adolescence** | |  | **Adulthood** | |
| **HR (95% CI)** | *p* interaction ***** |  | **HR (95% CI)** | *p* interaction |  | **HR (95% CI)** | *p* interaction |
| Deprivation | Higher | 1.75 (1.59-1.91) | 3.97x10-3 |  | 1.44 (1.35-1.54) | 3.72x10-3 |  | 1.30 (1.19-1.43) | .37 |
|  | Middle | 1.50 (1.32-1.71) | .56 |  | 1.26 (1.17-1.35) | .89 |  | 1.33 (1.21-1.48) | .25 |
|  | Lower | 1.41 (1.22-1.64) | Reference |  | 1.26 (1.16-1.36) | Reference |  | 1.21 (1.09-1.36) | Reference |
| Alcohol status | Alcohol use | 1.57 (1.47-1.69) | .03 |  | 1.30 (1.25-1.36) | 1.81x10-3 |  | 1.26 (1.19-1.34) | .09 |
|  | Never | 1.78 (1.46-2.16) | Reference |  | 1.52 (1.33-1.73) | Reference |  | 1.44 (1.20-1.74) | Reference |
| Ethnicity | White | 1.58 (1.48-1.67) | .51 |  | 1.31 (1.26-1.37) | .23 |  | 1.26 (1.19-1.33) | 3.74x10-3 |
|  | Ethnic minority | 2.27 (1.58-3.25) | Reference |  | 1.67 (1.31-2.14) | Reference |  | 1.75 (1.37-2.23) | Reference |
| * All *p* values are two-sided. *p* interaction were FDR-corrected, with significance defined as *p* < .05. | | | | | | | | |  |

| **eTable 27. Associations between in utero exposure to tobacco smoke and inflammation markers by covariates** | | | | | | | | | | |
| --- | --- | --- | --- | --- | --- | --- | --- | --- | --- | --- |
| **Characteristic** | | **CRP** | **Leukocyte** | **Lymphocyte** | **Lymphocyte %** | **Monocyte** | **Monocyte %** | **Neutrophill** | **Neutrophill %** | **Platelet** |
| Ethnicity |  |  | *p* interaction<0.001 | *p* interaction<0.001 | *p* interaction<0.001 | *p* interaction=1.00x10-5 |  | *p* interaction<0.001 | *p* interaction<0.001 | *p* interaction=8.68x10-3 |
|  | Ethnic Minority |  | 0.05(0.002-0.098) | 0.15(0.10-0.20) | 0.15(0.10-0.20) | -0.04(-0.09-0.004) |  | -0.01(-0.06-0.03) | -0.12(-0.17- -0.08) | -0.07(-0.12- -0.02) |
|  | White |  | 0.04(0.03-0.05) | -0.01(-0.01- -0.0006) | -0.05(-0.06- -0.04) | 0.08(0.07-0.09) |  | 0.04(0.03-0.04) | 0.03(0.02-0.03) | -0.06(-0.07- -0.05) |
|  |  |  |  |  |  |  |  |  |  |  |
| Deprivation |  | *p* interaction<0.001 | *p* interaction<0.001 | *p* interaction=.02 | *p* interaction=2.40x10-4 | *p* interaction=.03 |  | *p* interaction<0.001 | *p* interaction=1.10x10-4 | *p* interaction=3.10x10-4 |
|  | Lower | 0.18(0.17-0.19) | 0.08(0.07-0.10) | 0.20(0.19-0.21) | 0.19(0.17-0.20) | 0.01(-0.004-0.02) |  | 0.02(0.004-0.030) | -0.17(-0.18- -0.15) | -0.07(-0.08- -0.06) |
|  | Higher | -0.01(-0.02- -0.003) | -0.08(-0.09- -0.07) | 0.09(0.08-0.10) | 0.21(0.20-0.22) | -0.06(-0.07- -0.05) |  | -0.14(-0.15- -0.13) | -0.20(-0.21- -0.19) | -0.11(-0.12- -0.10) |
|  | Middle | 0.07(0.06-0.08) | -0.04(-0.06- -0.03) | 0.15(0.13-0.16) | 0.24(0.23-0.26) | -0.04(-0.05- -0.02) |  | -0.13(-0.14- -0.11) | -0.23(-0.24- -0.22) | -0.11(-0.12- -0.10) |
|  |  |  |  |  |  |  |  |  |  |  |
| Income |  |  | *p* interaction=0.045 |  |  |  |  | *p* interaction=0.048 |  |  |
|  | Unknown |  | -0.01(-0.04-0.01) |  |  |  |  | -0.09(-0.11- -0.07) |  |  |
|  | High |  | -0.17(-0.20- -0.14) |  |  |  |  | -0.25(-0.28- -0.23) |  |  |
|  | Low |  | 0.03(0.02-0.04) |  |  |  |  | -0.04(-0.05- -0.03) |  |  |
|  | Middle |  | -0.08(-0.10- -0.07) |  |  |  |  | -0.17(-0.18- -0.15) |  |  |
|  |  |  |  |  |  |  |  |  |  |  |
| BMI |  | *p* interaction=.03 |  |  |  |  |  |  | *p* interaction=.03 |  |
|  | Normal | -0.39(-0.40- -0.38) |  |  |  |  |  |  | -0.16(-0.18- -0.15) |  |
|  | Overweight | 0.08(0.07-0.10) |  |  |  |  |  |  | -0.23(-0.24- -0.22) |  |
|  | Obesity | 0.62(0.61-0.63) |  |  |  |  |  |  | -0.21(-0.22- -0.20 |  |
| Alcohol status |  |  |  |  |  |  | *p* interaction=6.53x10-3 | *p* interaction=.02 |  |  |
|  | Never |  |  |  |  |  | -0.11(-0.13- -0.08) | 0.06(0.04-0.09) |  |  |
|  | Alcohol use |  |  |  |  |  | -0.025(-0.03- -0.02) | -0.10(-0.11- -0.09) |  |  |
|  |  |  |  |  |  |  |  |  |  |  |
| Comparative body size at age 10 |  |  |  |  |  |  | *p* interaction=.01 |  |  |  |
| About average |  |  |  |  |  | -0.11(-0.12- -0.10) |  |  |  |
| Plumper |  |  |  |  |  | -0.02(-0.03- -0.002) |  |  |  |
| Thinner |  |  |  |  |  | -0.05(-0.07- -0.04) |  |  |  |
| * All *p* values were two-sided. *p* interaction were FDR-corrected, with significance defined as *p* < .05. | | | | | | | | | | |

| **eTable 28. Associations between age of smoking initiation and Inflammation makers by covariates** | | | | | | | | | | | |
| --- | --- | --- | --- | --- | --- | --- | --- | --- | --- | --- | --- |
| **Characteristics** | | **Smoking initiation age** | **CRP** | **Leukocyte** | **Lymphocyte** | **Lymphocyte %** | **Monocyte** | **Monocyte %** | **Neutrophill** | **Neutrophill %** | **Platelet** |
| Age |  |  |  | *p* interaction<0.001 | *p* interaction<0.001 | *p* interaction<0.001 |  |  | *p* interaction=7.81x10-3 | *p* interaction<0.001 |  |
|  | Middle age | adulthood |  | 0.12(0.11-0.14) | 0.32(0.30-0.33) | 0.29(0.27-0.30) |  |  | -0.22(-0.23- -0.21) | -0.25(-0.26- -0.23) |  |
|  |  | adolescence |  | 0.11(0.10-0.12) | 0.30(0.29-0.32) | 0.28(0.27-0.29) |  |  | 0.02(0.01-0.03) | -0.24(-0.26- -0.23) |  |
|  |  | childhood |  | 0.27(0.25-0.28) | 0.42(0.40-0.43) | 0.26(0.25-0.28) |  |  | 0.01(0.002-0.024) | -0.22(-0.24- -0.20) |  |
|  | Older age | adulthood |  | 0.15(0.13-0.17) | 0.22(0.20-0.24) | 0.15(0.12-0.17) |  |  | 0.16(0.15-0.18) | -0.15(-0.18- -0.13) |  |
|  |  | adolescence |  | 0.17(0.16-0.19) | 0.21(0.19-0.23) | 0.12(0.11-0.14) |  |  | -0.12(-0.14- -0.11) | -0.14(-0.16- -0.12) |  |
|  |  | childhood |  | 0.29(0.25-0.32) | 0.24(0.21-0.28) | 0.06(0.02-0.09) |  |  | 0.06(0.04-0.09) | -0.08(-0.12- -0.04) |  |
|  |  |  |  |  |  |  |  |  |  |  |  |
| Gender |  |  | *p* interaction<0.001 | *p* interaction<0.001 | *p* interaction=1.60x10-4 | *p* interaction<0.001 | *p* interaction<0.001 | *p* interaction=.02 | *p* interaction<0.001 | *p* interaction<0.001 | *p* interaction=.046 |
|  | Female | adulthood | 0.14(0.12-0.16) | 0.17(0.15-0.19) | 0.17(0.15-0.18) | 0.06(0.05-0.08) | 0.30(0.29-0.32) | 0.19(0.18-0.21) | 0.09(0.08-0.11) | -0.15(-0.17- -0.13) | -0.30(-0.32- -0.28) |
|  |  | adolescence | 0.16(0.15-0.17) | 0.17(0.15-0.18) | 0.15(0.14-0.17) | 0.06(0.05-0.07) | 0.31(0.30-0.32) | 0.21(0.20-0.22) | 0.09(0.08-0.10) | -0.15(-0.16- -0.13) | -0.29(-0.31- -0.28) |
|  |  | childhood | 0.28(0.26-0.30) | 0.29(0.27-0.31) | 0.26(0.24-0.28) | 0.07(0.05-0.08) | 0.38(0.36-0.40) | 0.18(0.16-0.20) | 0.20(0.18-0.22) | -0.15(-0.17- -0.13) | -0.24(-0.26- -0.22 |
|  | Male | adulthood | 0.14(0.12-0.16) | 0.13(0.11-0.14) | 0.39(0.38-0.41) | 0.38(0.36-0.39) | -0.19(-0.20- -0.17) | -0.30(-0.32- -0.29) | 0.01(-0.01-0.03) | -0.26(-0.27- -0.24) | 0.15(0.13-0.17) |
|  |  | adolescence | 0.18(0.17-0.19) | 0.12(0.11-0.13) | 0.39(0.38-0.41) | 0.38(0.37-0.39) | -0.18(-0.19- -0.17) | -0.30(-0.31- -0.28) | 0.004(-0.01-0.02) | -0.26(-0.28- -0.25) | 0.16(0.15-0.17) |
|  |  | childhood | 0.28(0.25-0.30) | 0.31(0.28-0.33) | 0.49(0.47-0.52) | 0.32(0.29-0.34) | -0.11(-0.13- -0.08) | -0.35(-0.37- -0.32) | 0.20(0.17-0.22) | -0.19(-0.22- -0.16) | 0.22(0.19-0.24) |
|  |  |  |  |  |  |  |  |  |  |  |  |
|  |  |  |  | *p* interaction<0.001 |  | *p* interaction<0.001 |  |  | *p* interaction<0.001 | *p* interaction<0.001 |  |
| Ethnicity | Ethnic Minority | adulthood |  | 0.14(0.09-0.19) |  | 0.47(0.42-0.52) |  |  | -0.04(-0.09-0.01) | -0.41(-0.46- -0.37) |  |
|  | adolescence |  | 0.16(0.12-0.21) |  | 0.39(0.34-0.43) |  |  | 0.16(0.14-0.17) | -0.33(-0.38- -0.28) |  |
|  |  | childhood |  | 0.31(0.23-0.40) |  | 0.31(0.23-0.39) |  |  | 0.01(-0.03-0.06) | -0.25(-0.33- -0.17) |  |
|  | White | adulthood |  | 0.18(0.17-0.19) |  | -0.05(-0.06- -0.04) |  |  | 0.16(0.15-0.16) | 0.03(0.02-0.04) |  |
|  |  | adolescence |  | 0.18(0.17-0.19) |  | -0.06(-0.07- -0.05) |  |  | 0.19(0.10-0.27) | 0.03(0.03-0.04) |  |
|  |  | childhood |  | 0.33(0.32-0.34) |  | -0.08(-0.09- -0.06) |  |  | 0.30(0.29-0.32) | 0.06(0.05-0.08) |  |
|  |  |  |  |  |  |  |  |  |  |  |  |
| Deprivation |  |  | *p* interaction<0.001 | *p* interaction<0.001 | *p* interaction<0.001 |  | *p* interaction<0.001 | *p* interaction<0.001 | *p* interaction<0.001 | *p* interaction=0.04 | *p* interaction=1.00x10-5 |
|  | Lower | adulthood | 0.09(0.06-0.11) | 0.06(0.04-0.08) | 0.23(0.21-0.25) |  | 0.03(0.01-0.05) | -0.02(-0.040- -0.003) | -0.05(-0.07- -0.03) | -0.24(-0.26- -0.22) | -0.06(-0.08- -0.03) |
|  |  | adolescence | 0.10(0.08-0.11) | 0.06(0.05-0.08) | 0.22(0.21-0.24) |  | 0.04(0.03-0.06) | -0.01(-0.02-0.01) | -0.04(-0.05- -0.02) | -0.23(-0.25- -0.22) | -0.08(-0.09- -0.06) |
|  |  | childhood | 0.16(0.13-0.19) | 0.14(0.11-0.17) | 0.29(0.26-0.32) |  | 0.10(0.07-0.13) | -0.01(-0.03-0.02) | 0.02(-0.01-0.05) | -0.24(-0.27- -0.21) | -0.05(-0.08- -0.03) |
|  | Higher | adulthood | 0.18(0.16-0.20) | 0.22(0.20-0.24) | 0.32(0.30-0.34) |  | 0.08(0.06-0.10) | -0.08(-0.10- -0.06) | 0.13(0.11-0.15) | -0.18(-0.20- -0.16) | -0.08(-0.10- -0.06) |
|  |  | adolescence | 0.23(0.22-0.25) | 0.24(0.23-0.26) | 0.33(0.31-0.34) |  | 0.10(0.08-0.11) | -0.08(-0.10- -0.07) | 0.15(0.14-0.17) | -0.17(-0.18- -0.15) | -0.05(-0.06- -0.03) |
|  |  | childhood | 0.38(0.35-0.40) | 0.43(0.41-0.46) | 0.45(0.43-0.47) |  | 0.19(0.17-0.22) | -0.13(-0.15- -0.11) | 0.34(0.32-0.36) | -0.12(-0.15- -0.10) | 0.03(0.005-0.048) |
|  | Middle | adulthood | 0.10(0.08-0.13) | 0.13(0.11-0.15) | 0.27(0.25-0.29) |  | 0.05(0.03-0.07) | -0.05(-0.07- -0.03) | 0.02(0.002-0.044) | -0.21(-0.24- -0.19) | -0.09(-0.11- -0.07) |
|  |  | adolescence | 0.15(0.13-0.16) | 0.11(0.09-0.12) | 0.26(0.24-0.27) |  | 0.06(0.05-0.08) | -0.02(-0.03- -0.01) | 0.004(-0.01-0.02) | -0.22(-0.23- -0.21) | -0.07(-0.09- -0.06) |
|  |  | childhood | 0.24(0.22-0.27) | 0.20(0.18-0.23) | 0.32(0.29-0.35) |  | 0.11(0.09-0.14) | -0.04(-0.06- -0.01) | 0.10(0.08-0.13) | -0.20(-0.23- -0.18) | -0.03(-0.04- -0.002) |
|  |  |  |  |  |  |  |  |  |  |  |  |
| Education |  |  | *p* interaction<0.001 | *p* interaction<0.001 | *p* interaction<0.001 | *p* interaction=3.00x10-5 | *p* interaction<0.001 | *p* interaction=.01 | *p* interaction<0.001 | *p* interaction=5.80x10-4 |  |
|  | Above college | adulthood | 0.01(-0.01-0.03) | 0.04(0.02-0.06) | 0.24(0.23-0.26) | 0.22(0.20-0.23) | -0.08(-0.10- -0.07) | 0.01(-0.01-0.03) | -0.23(-0.25- -0.21) | -0.05(-0.07- -0.03) |  |
|  |  | adolescence | 0.04(0.02-0.06) | 0.02(0.01-0.04) | 0.26(0.25-0.28) | 0.21(0.20-0.23) | -0.02(-0.04- -0.01) | 0.003(-0.01-0.02) | -0.25(-0.27- -0.23) | -0.07(-0.09- -0.06) |  |
|  |  | childhood | 0.21(0.17-0.24) | 0.18(0.14-0.21) | 0.25(0.22-0.29) | 0.33(0.29-0.36) | -0.06(-0.07- -0.05) | 0.09(0.06-0.12) | -0.24(-0.28- -0.21) | 0.06(0.02-0.09) |  |
|  | Less  than college | adulthood | 0.26(0.25-0.18) | 0.24(0.23-0.26) | 0.20(0.18-0.21) | 0.33(0.32-0.35) | -0.02(-0.03- -0.001) | 0.10(0.09-0.12) | -0.17(-0.19- -0.16) | 0.14(0.12-0.16) |  |
|  | adolescence | 0.29(0.28-0.31) | 0.24(0.22-0.25) | 0.18(0.17-0.19) | 0.31(0.30-0.32) | -0.10(-0.11- -0.08) | 0.12(0.11-0.13) | -0.16(-0.17- -0.15) | 0.14(0.13-0.15) |  |
|  | childhood | 0.40(0.39-0.42) | 0.38(0.36-0.40) | 0.16(0.14-0.17) | 0.41(0.39-0.43) | -0.03(-0.07- 0.001) | 0.19(0.17-0.21) | -0.13(-0.15- -0.11) | 0.28(0.26-0.30) |  |
|  |  |  |  |  |  |  |  |  |  |  |  |
| Income |  |  | *p* interaction<0.001 | *p* interaction<0.001 | *p* interaction<0.001 |  | *p* interaction<0.001 | *p* interaction=8.00x10-5 | *p* interaction<0.001 |  |  |
|  | Unknow | adulthood | 0.18(0.14-0.22) | 0.15(0.11-0.19) | 0.28(0.25-0.32) |  | -0.09(-0.10- -0.08) | -0.04(-0.08- -0.003) | 0.04(-0.0001-0.08) |  |  |
|  |  | adolescence | 0.17(0.14-0.19) | 0.14(0.11-0.16) | 0.27(0.24-0.29) |  | 0.07(0.03-0.10) | -0.02(-0.04-0.01) | 0.03(0.01-0.06) |  |  |
|  |  | childhood | 0.30(0.26-0.35) | 0.26(0.21-0.31) | 0.33(0.28-0.37) |  | 0.09(0.07-0.11) | -0.09(-0.13- -0.04) | 0.18(0.13-0.22) |  |  |
|  | High | adulthood | -0.05(-0.10- -0.001) | -0.04(-0.09- -0.03) | 0.22(0.16-0.27) |  | 0.11(0.07-0.16) | -0.03(-0.08-0.02) | -0.14(-0.19- -0.09) |  |  |
|  |  | adolescence | -0.03(-0.07- -0.01) | -0.07(-0.11- -0.03) | 0.22(0.18-0.25) |  | -0.17(-0.19- -0.15) | -0.03(-0.06-0.01) | -0.18(-0.21- -0.14) |  |  |
|  |  | childhood | 0.05(-0.04-0.14) | -0.02(-0.11-0.07) | 0.24(0.15-0.33) |  | -0.05(-0.10-0.01) | 0.05(-0.04-0.14) | -0.14(-0.23- -0.05) |  |  |
|  | Low | adulthood | 0.16(0.15-0.18) | 0.18(0.16-0.19) | 0.29(0.28-0.31) |  | -0.07(-0.10- -0.03) | -0.07(-0.08- -0.05) | 0.09(0.07-0.10) |  |  |
|  |  | adolescence | 0.21(0.20-0.22) | 0.19(0.17-0.20) | 0.28(0.27-0.29) |  | 0.01(-0.08-0.10) | -0.05(-0.06- -0.04) | 0.09(0.08-0.11) |  |  |
|  |  | childhood | 0.32(0.30-0.34) | 0.34(0.32-0.36) | 0.39(0.37-0.41) |  | -0.09(-0.10- -0.08) | -0.08(-0.10- -0.07) | 0.25(0.23-0.26) |  |  |
|  | Middle | adulthood | 0.03(0.01-0.06) | 0.06(0.03-0.09) | 0.25(0.23-0.28) |  | 0.09(0.08-0.10) | -0.02(-0.05-0.01) | -0.05(-0.08- -0.03) |  |  |
|  |  | adolescence | 0.04(0.02-0.06) | 0.02(0.002-0.042) | 0.24(0.22-0.26) |  | 0.17(0.16-0.19) | -0.02(-0.04- -0.003) | -0.09(-0.11- -0.07) |  |  |
|  |  | childhood | 0.17(0.13-0.20) | 0.13(0.09-0.17) | 0.33(0.29-0.36) |  | -0.12(-0.13- -0.11) | -0.05(-0.08- -0.01) | 0.01(-0.03-0.04) |  |  |
|  |  |  |  |  |  |  |  |  |  |  |  |
| BMI |  |  | *p* interaction<0.001 | *p* interaction<0.001 | *p* interaction<0.001 | *p* interaction=3.59x10-3 | *p* interaction=6.00x10-5 | *p* interaction<0.001 | *p* interaction<0.001 |  | *p* interaction<0.001 |
|  | Normal | adulthood | -0.32(-0.34- -0.30) | 0.004(-0.02-0.02) | 0.13(0.10-0.15) | 0.18(0.16-0.20) | -0.06(-0.08- -0.04) | -0.07(-0.09- -0.05) | -0.03(-0.05- -0.01) |  | -0.08(-0.10- -0.06) |
|  |  | adolescence | -0.26(-0.27- -0.24) | 0.03(0.01-0.04) | 0.13(0.12-0.15) | 0.17(0.15-0.18) | -0.05(-0.07- -0.03) | -0.07(-0.09- -0.06) | -0.005(-0.02-0.01) |  | -0.06(-0.07- -0.04) |
|  |  | childhood | -0.13(-0.15- -0.10) | 0.24(0.21-0.27) | 0.24(0.21-0.27) | 0.10(0.07-0.13) | 0.07(0.05-0.01) | -0.09(-0.12- -0.07) | 0.22(0.19-0.25) |  | 0.02(-0.01-0.05) |
|  | Overweight | adulthood | 0.14(0.13-0.16) | -0.13(-0.14- -0.13) | 0.28(0.26-0.30) | 0.25(0.23-0.27) | 0.05(0.03-0.06) | -0.04(-0.06- -0.03) | 0.01(-0.01-0.02) |  | -0.08(-0.09- -0.06) |
|  |  | adolescence | 0.18(0.17-0.19) | 0.12(0.10-0.14) | 0.26(0.25-0.27) | 0.23(0.21-0.24) | 0.05(0.03-0.06) | -0.04(-0.06- -0.03) | 0.02(0.005-0.031) |  | -0.06(-0.07- -0.04) |
|  |  | childhood | 0.25(0.23-0.27) | 0.12(0.11-0.13) | 0.35(0.33-0.37) | 0.22(0.20-0.25) | 0.10(0.08-0.12) | -0.08(-0.10- -0.05) | 0.13(0.11-0.15) |  | -0.01(-0.03-0.01) |
|  | Obesity | adulthood | 0.64(0.62-0.67) | 0.23(0.21-0.26) | 0.45(0.42-0.47) | 0.21(0.19-0.24) | 0.21(0.19-0.23) | -0.06(-0.08- -0.04) | 0.22(0.19-0.24) |  | -0.07(-0.10- -0.05) |
|  |  | adolescence | 0.63(0.62-0.64) | 0.36(0.34-0.38) | 0.44(0.43-0.46) | 0.23(0.22-0.25) | 0.24(0.22-0.26) | -0.01(-0.03-0.01) | 0.17(0.16-0.19) |  | -0.09(-0.10- -0.07) |
|  |  | childhood | 0.70(0.68-0.73) | 0.33(0.31-0.35) | 0.52(0.49-0.54) | 0.21(0.18-0.23) | 0.28(0.26-0.31) | -0.06(-0.09- -0.04) | 0.30(0.27-0.32) |  | -0.03(-0.05--0.004) |
|  |  |  |  |  |  |  |  |  |  |  |  |
| Alcohol status |  |  |  | *p* interaction<0.001 | *p* interaction<0.001 |  |  | *p* interaction<0.001 | *p* interaction<0.001 |  |  |
| Never | adulthood |  | 0.30(0.26-0.35) | 0.34(0.30-0.39) |  |  | -0.18(-0.22- -0.13) | 0.24(0.19-0.28) |  |  |
|  |  | adolescence |  | 0.28(0.25-0.31) | 0.34(0.31-0.37) |  |  | -0.13(-0.16- -0.09) | 0.20(0.17-0.23) |  |  |
|  |  | childhood |  | 0.47(0.42-0.53) | 0.50(0.45-0.55) |  |  | -0.20(-0.25- -0.15) | 0.38(0.32-0.43) |  |  |
|  | Alcohol use | adulthood |  | 0.13(0.12-0.14) | 0.27(0.26-0.29) |  |  | -0.04(-0.06- -0.03) | 0.03(0.01-0.04) |  |  |
|  |  | adolescence |  | 0.13(0.12-0.14) | 0.27(0.25-0.28) |  |  | -0.03(-0.05- -0.02) | 0.03(0.02-0.04) |  |  |
|  |  | childhood |  | 0.27(0.26-0.29) | 0.36(0.35-0.38) |  |  | -0.06(-0.08- -0.05) | 0.17(0.16-0.19) |  |  |
|  |  |  |  |  |  |  |  |  |  |  |  |
| Comparative body size at age 10 |  |  |  |  | *p* interaction=.04 |  |  |  |  |  | *p* interaction=.03 |
| About average | adulthood |  |  | 0.27(0.25-0.28) |  |  |  |  |  | -0.08(-0.10- -0.07) |
|  | adolescence |  |  | 0.26(0.25-0.27) |  |  |  |  |  | -0.07(-0.08- -0.05) |
|  | childhood |  |  | 0.35(0.33-0.37) |  |  |  |  |  | -0.03(-0.05- -0.01) |
|  | Plumper | adulthood |  |  | 0.31(0.28-0.34) |  |  |  |  |  | -0.08(-0.11- -0.05) |
|  |  | adolescence |  |  | 0.31(0.29-0.33) |  |  |  |  |  | -0.09(-0.11- -0.07) |
|  |  | childhood |  |  | 0.46(0.42-0.49) |  |  |  |  |  | -0.04(-0.07- -0.004) |
|  | Thinner | adulthood |  |  | 0.29(0.27-0.31) |  |  |  |  |  | -0.06(-0.08- -0.04) |
|  |  | adolescence |  |  | 0.27(0.26-0.28) |  |  |  |  |  | -0.05(-0.07- -0.04) |
|  |  | childhood |  |  | 0.36(0.34-0.39) |  |  |  |  |  | 0.03(0.003-0.05) |
|  |  |  |  |  |  |  |  |  |  |  |  |
| Comparative height at age 10 |  |  |  |  |  |  | *p* interaction=.04 | *p* interaction=3.97x10-3 |  |  |  |
| About average | adulthood |  |  |  |  | 0.04(0.03-0.06) | -0.07(-0.09- -0.05) |  |  |  |
|  | adolescence |  |  |  |  | 0.07(0.06-0.09) | -0.04(-0.05- -0.03) |  |  |  |
|  | childhood |  |  |  |  | 0.15(0.13-0.17) | -0.08(-0.10- -0.06) |  |  |  |
|  | Shorter | adulthood |  |  |  |  | 0.11(0.08-0.13) | -0.05(-0.08- -0.03) |  |  |  |
|  |  | adolescence |  |  |  |  | 0.10(0.08-0.12) | -0.07(-0.08- -0.05) |  |  |  |
|  |  | childhood |  |  |  |  | 0.22(0.19-0.25) | -0.05(-0.08- -0.02) |  |  |  |
|  | Taller | adulthood |  |  |  |  | 0.05(0.03-0.07) | -0.03(-0.05- -0.01) |  |  |  |
|  |  | adolescence |  |  |  |  | 0.04(0.03-0.06) | -0.02(-0.04- -0.01) |  |  |  |
|  |  | childhood |  |  |  |  | 0.09(0.06-0.12) | -0.10(-0.13- -0.07) |  |  |  |
| * All p values were two-sided. *p* interaction were FDR-corrected, with significance defined as *p* < .05. | | | | | | | | | | | |

| **eTable 29.** **Associations between early-life tobacco exposure and SF coupling by BMI** | | | | | | | | |
| --- | --- | --- | --- | --- | --- | --- | --- | --- |
|  |  | **In utero exposure to tobacco smoke** | |  | **Age of smoking initiation** | | | |
|  | **Exposed** | |  | **Adulthood** | | **Adolescence** | **Childhood** |
| **Characteristic** | | **R_G_insular_short** |  |  | | **L_G_and_S_cingul** | | | |
| BMI |  | *p* interaction=.03 | |  | *p* interaction=.02 | | | |
|  | Normal | -0.13(-0.18- -0.08) | |  | -0.17(-0.24- -0.09) | | -0.18(-0.24- -0.13) | -0.19(-0.31- -0.08) |
|  | Overweight | -0.15(-0.19- -0.10) | |  | -0.25(-0.32- -0.19) | | -0.16(-0.21- -0.10) | -0.20(-0.29- -0.12) |
|  | Obesity | -0.09(-0.15- -0.04) | |  | -0.17(-0.26- -0.07) | | -0.26(-0.33- -0.20) | -0.11(-0.22-0.004) |
| * All *p* values were two-sided. *p* interaction were FDR-corrected, with significance defined as *p* < .05. | | | | | | | | |

**eFigure 1. Flowchart of study participant selection**

Flowchart illustrating the criteria used to select participants from the UK Biobank for the current study. For each analysis, participants with missing data on key variables or covariates, and those who responded “prefer not to answer” or “do not know,” were excluded.

**eFigure 2. Associations between inflammatory markers and the incidence of depression and anxiety**


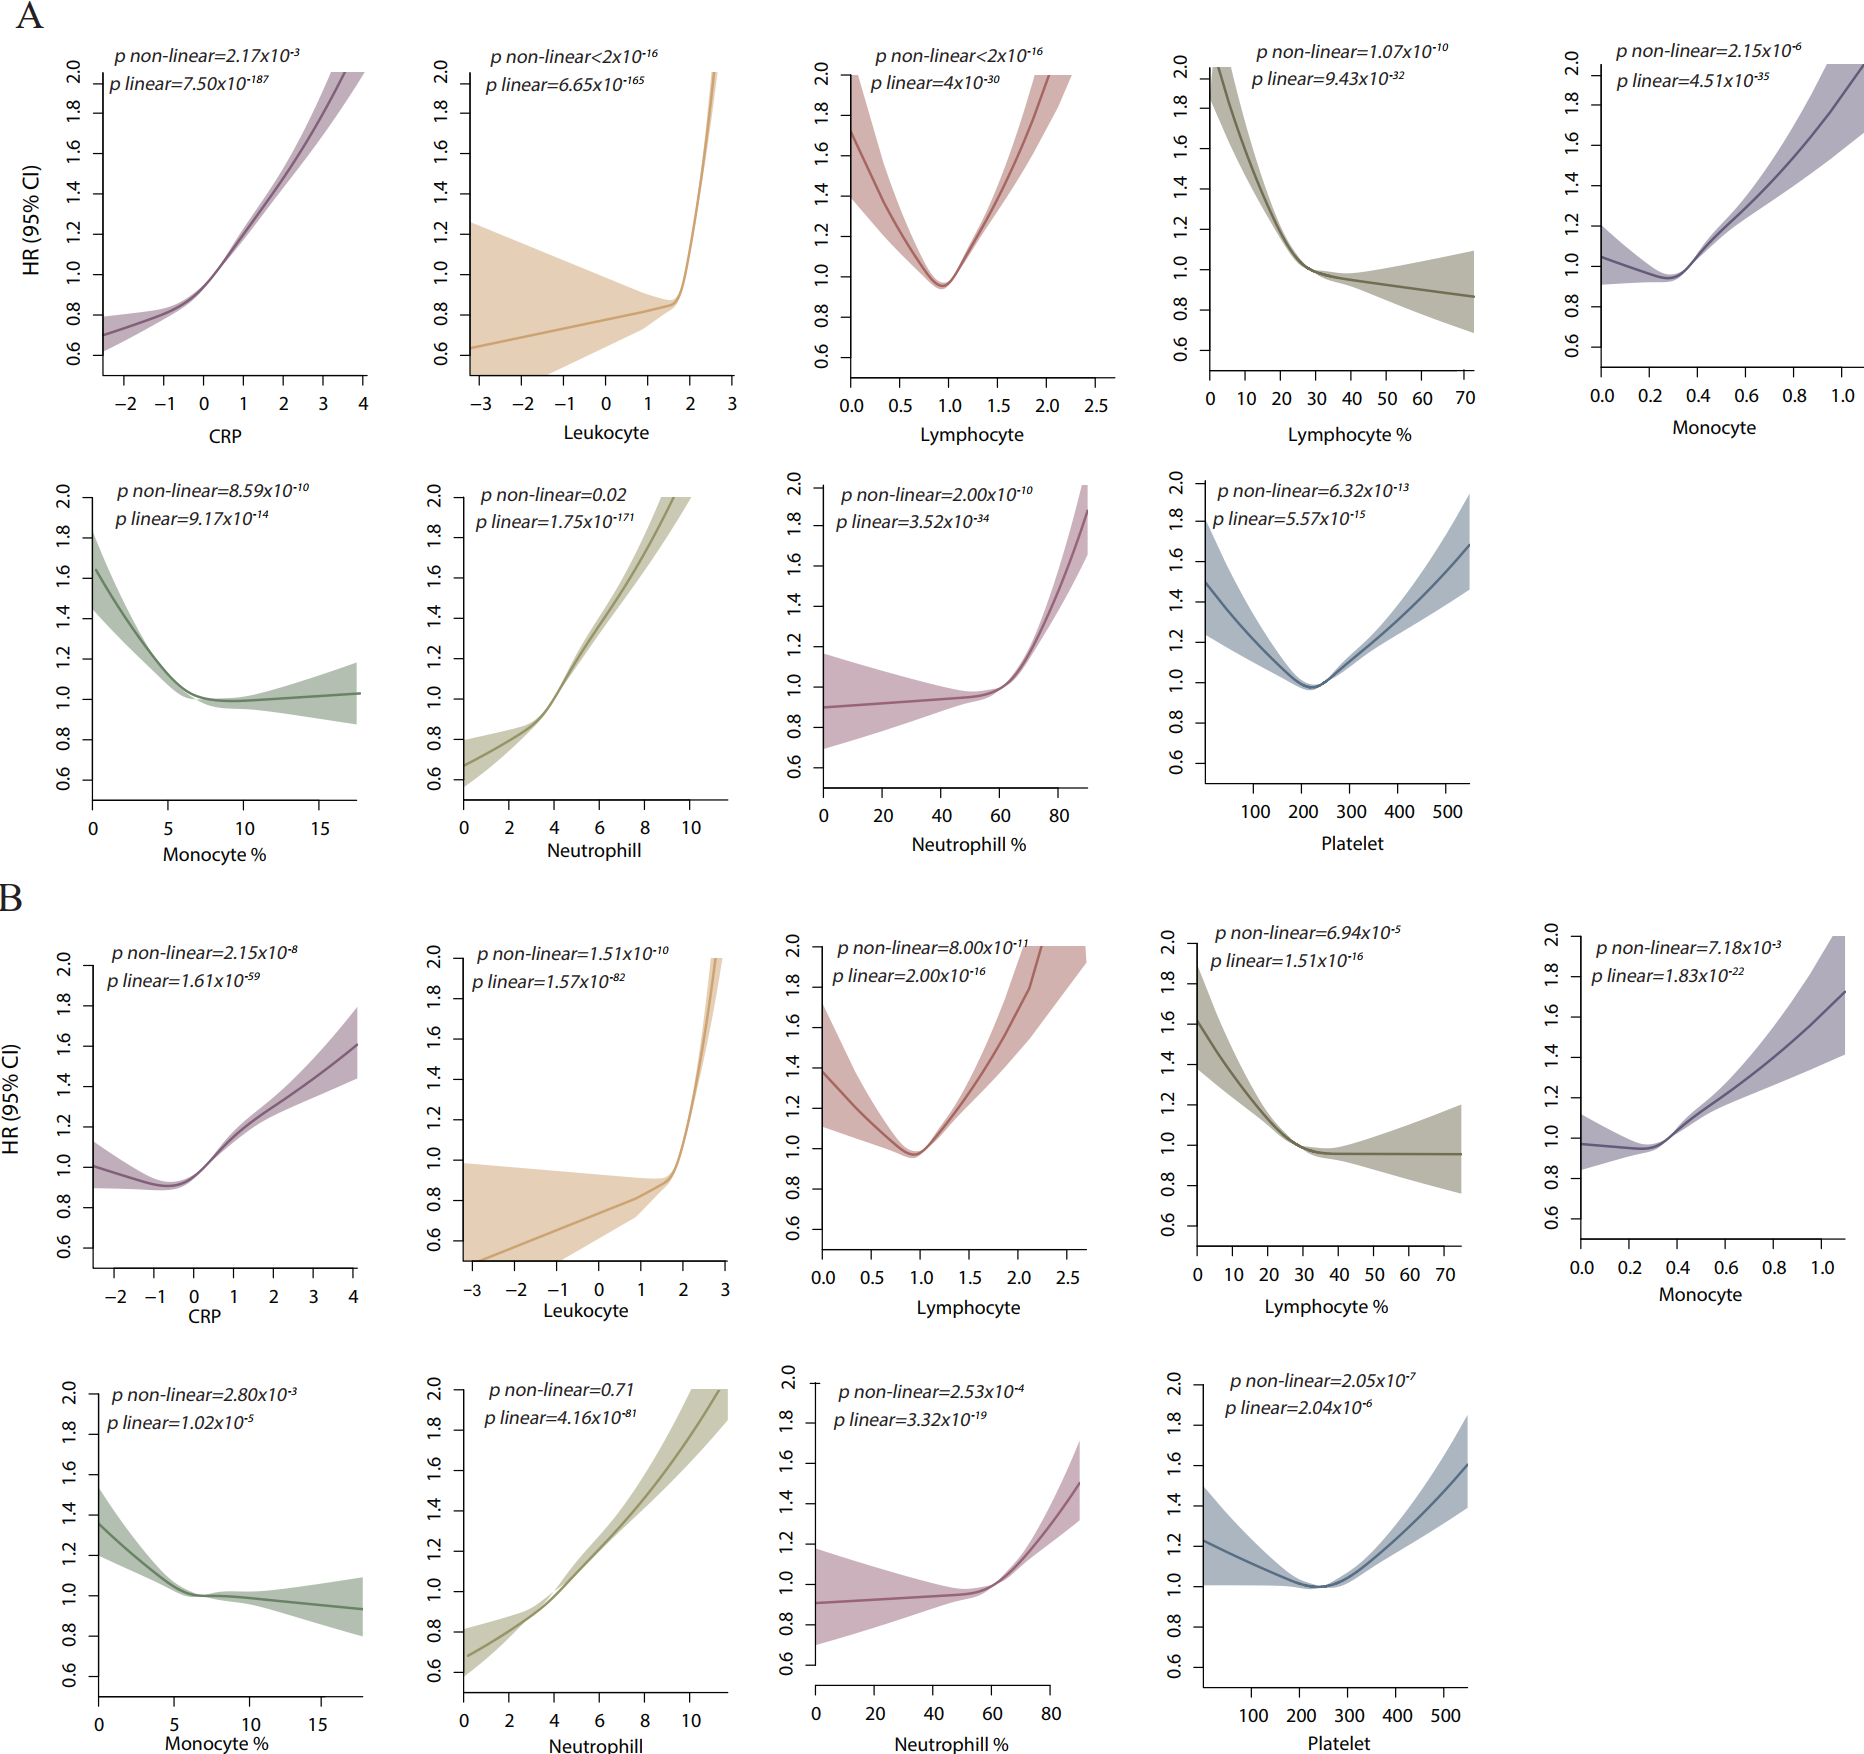


**(A)** Exposure–response curves between inflammatory markers and depression risk revealed significant non-linear associations for all nine markers. **(B)** Exposure–response curves for inflammatory markers and anxiety risk revealed significant non-linear associations for eight markers (excluding neutrophils).

**eFigure 3. Associations between brain regional SF coupling and the incidence of depression and anxiety**
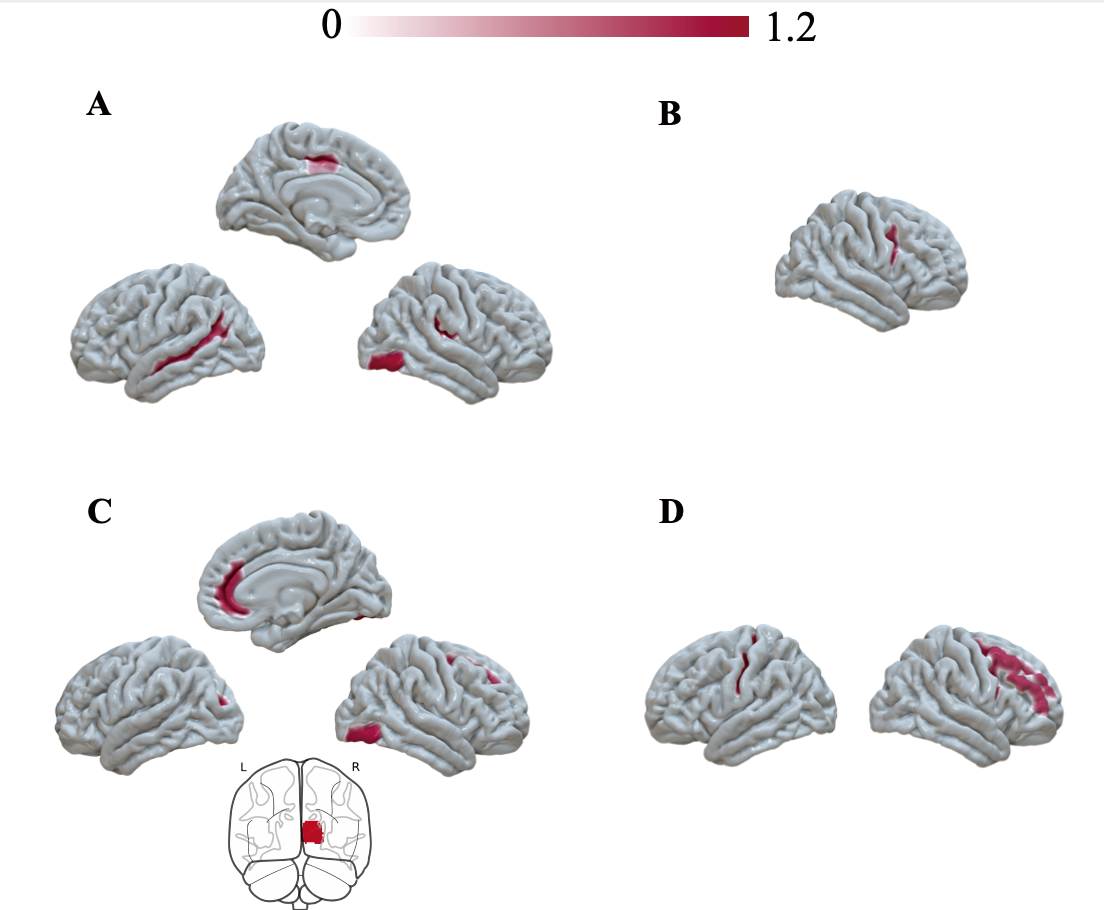


**(A)** Among the 17 brain regions affected by in utero tobacco exposure, four regions showed significant associations with depression incidence: the left mid-posterior cingulate gyrus and sulcus, left superior temporal sulcus, right inferior occipital gyrus and sulcus, and right posterior lateral fissure.**(B)** Among the 17 regions affected by in utero tobacco exposure, only the right inferior part of the precentral sulcus was significantly associated with anxiety incidence. **(C)** Among the 50 brain regions differing by age of smoking initiation, six regions were significantly associated with depression incidence: the left superior occipital sulcus and transversal sulcus, right inferior occipital gyrus and sulcus, right anterior cingulate gyrus and sulcus, right superior frontal sulcus, right posterior thalamus, and right anterior thalamus. **(D**) Among the 50 regions differing by age of smoking initiation, five regions were significantly associated with anxiety incidence: the left central sulcus, right middle frontal gyrus, right superior frontal sulcus, right inferior part of the precentral sulcus, and right superior part of the precentral sulcus.

**eFigure 4. Brain regional SF coupling associated with early-life tobacco exposure was significantly linked to inflammatory markers.**

**
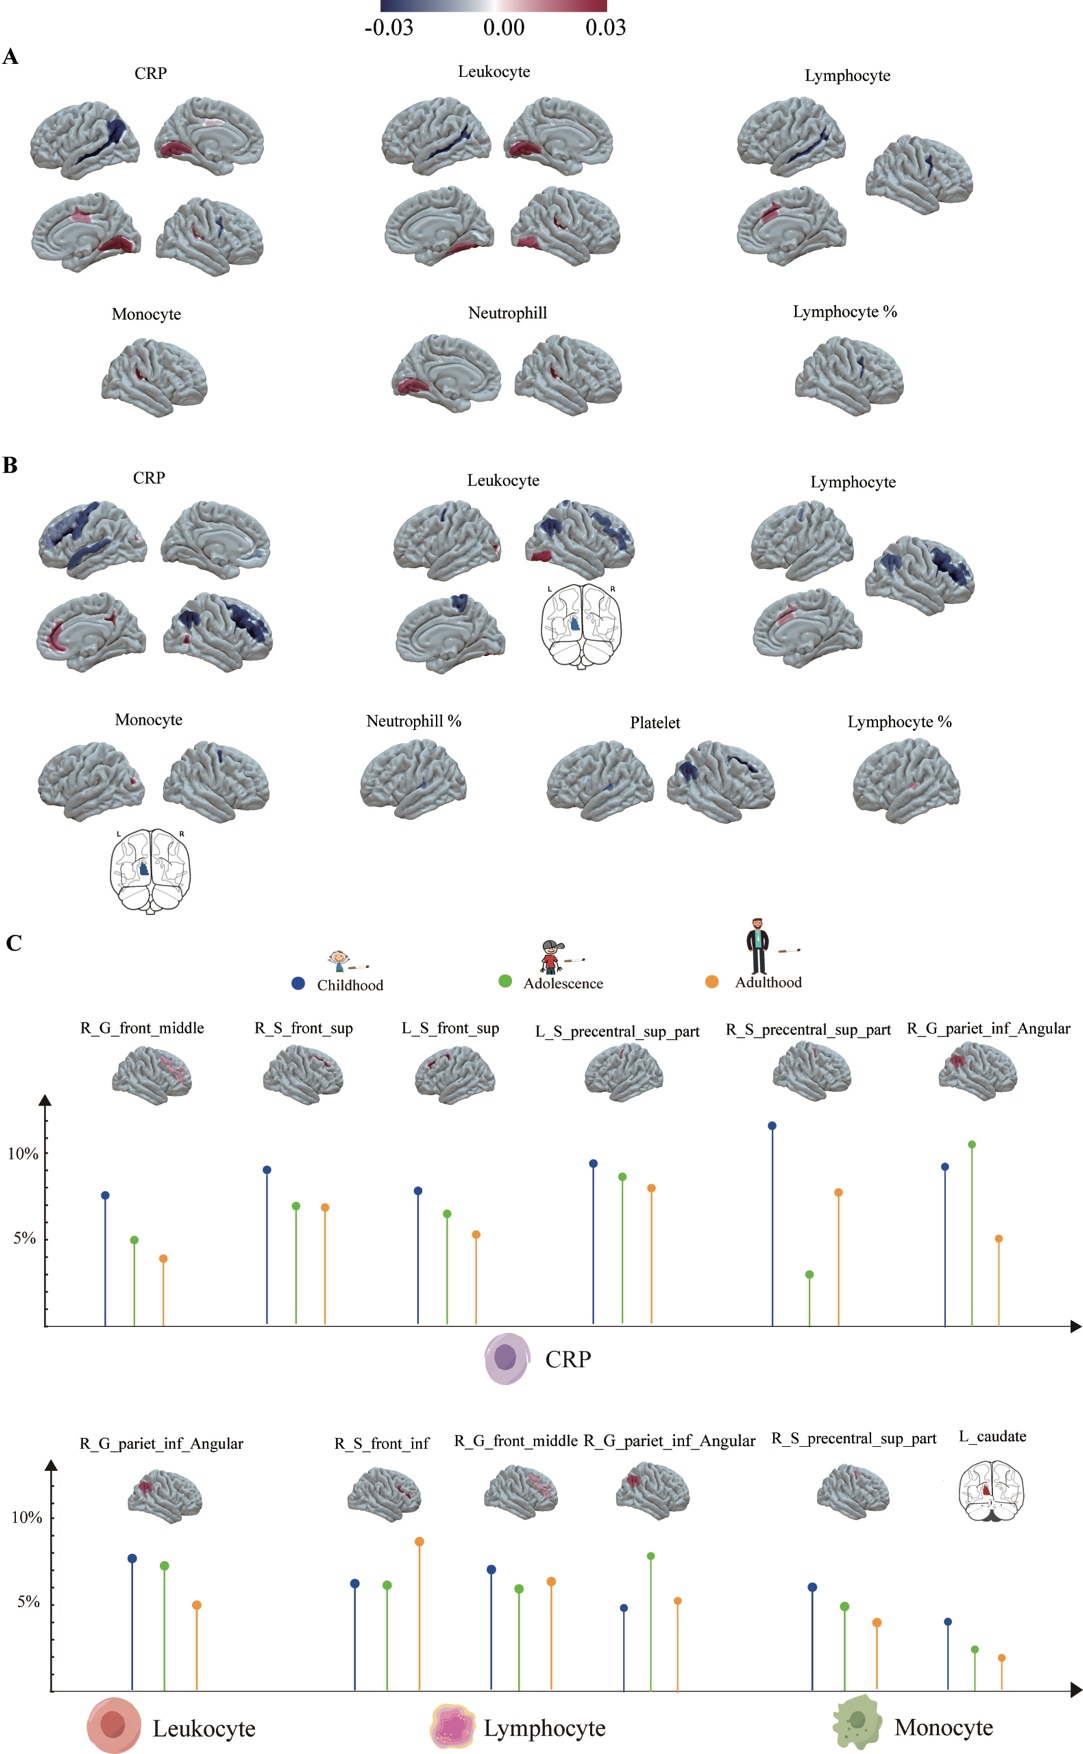
**

**(A)** Following FDR correction (p < 0.05), six inflammatory markers—C-reactive protein (CRP), leukocyte count, lymphocyte percentage, lymphocyte count, monocyte count, and neutrophil count—showed significant associations with SF coupling in brain regions previously identified as affected by in utero tobacco exposure. **(B)** Following FDR correction (p < 0.05), seven inflammatory markers—CRP, leukocyte count, lymphocyte count, lymphocyte percentage, monocyte count, neutrophil percentage, and platelet count—were significantly associated with SF coupling in brain regions previously identified as affected by the age of smoking initiation. L, left; R, right. (C) Age of smoking initiation influences SF coupling in specific brain regions through shared inflammatory markers. The y axis represents the proportion of total variance due to mediation (%). Blue, green, and orange dots indicate the mediation proportions for childhood, adolescence, and adulthood smoking initiation, respectively. Each panel represents a specific inflammatory marker (CRP, leukocyte, lymphocyte, and monocyte), with corresponding brain regions displayed above the bars.

**eFigure 5. Associations between age of smoking initiation and incident depression stratified by covariates**

**(A) Among all covariates, depression interacted significantly with several covariates including BMI, ethnicity, alcohol use, deprivation and age on incident depression. The dashed vertical line indicates threshold of significance after correcting for multiple testing (−log(0.05/10) = 2.30). (B) Among all covariates, only deprivation, alcohol use and ethnicity showed a significant interaction with age of smoking initiation on incident anxiety. The dashed vertical line indicates threshold of significance after correcting for multiple testing (−log(0.05/10) = 2.30).**

eReferences

1 Miller, K. L. *et al.* Multimodal population brain imaging in the UK Biobank prospective epidemiological study. *Nature neuroscience* **19**, 1523-1536 (2016).

2 Alfaro-Almagro, F. *et al.* Image processing and Quality Control for the first 10,000 brain imaging datasets from UK Biobank. *Neuroimage* **166**, 400-424 (2018).
